# Supplementary material for: The fundamental nature and importance of electrostatic potential in hydrogen bond formation: a case study of heterocycles frequently observed in drugs
Source: Royal Society of Chemistry journal article supplement (doi:10.1039/d3nj02509h), 2023-01-01
Supplement: d3nj02509h1.pdf [file d3nj02509h1.pdf]

# The fundamental nature and importance of electrostatic potential in hydrogen bond formation: A case study of heterocycles frequently observed in drugs

Mambatta Haritha<sup>a,b</sup> and Cherumuttathu H. Suresh<sup>\*a,b</sup>

<sup>a</sup>Chemical Sciences and Technology Division, CSIR– National Institute for Interdisciplinary Science and Technology, Thiruvananthapuram Kerala, 695 019, India.

<sup>b</sup>Academy of Scientific and Innovative Research (AcSIR), Ghaziabad 201002, India.  
Tel: +91-471-2515472, E-mail: sureshch@niist.res.in, sureshch@gmail.com

## Supporting Information

### Table of Contents

|                                                                                                                                                    |     |
|----------------------------------------------------------------------------------------------------------------------------------------------------|-----|
| 1. Figure S1. Dataset of ring systems in $r_b$ category (CN <sup>—</sup> HN motif) and their ring...H <sub>2</sub> O complex                       | –S2 |
| 2. Figure S2. Dataset of ring systems in $r_c$ category (CN <sup>—</sup> HC motif) and their ring...H <sub>2</sub> O complex                       | –S3 |
| 3. Figure S3. Dataset of ring systems in $r_d$ category (CF <sup>—</sup> HC motif) and their ring...H <sub>2</sub> O complex                       | –S4 |
| 4. Figure S4. Dataset of ring systems in $r_e$ category (CN <sup>—</sup> OC motif) and their ring...H <sub>2</sub> O complex                       | –S5 |
| 5. Table S1. MESP topology data and hydrogen bond energy data in kcal/mol for ring molecules in category $r_b$ .                                   | –S6 |
| 6. Table S2. MESP topology data and hydrogen bond energy data in kcal/mol for ring molecules in category $r_c$ .                                   | –S6 |
| 7. Table S3. MESP topology data and hydrogen bond energy data in kcal/mol for ring molecules in category $r_d$ .                                   | –S7 |
| 8. Table S4. MESP topology data and hydrogen bond energy data in kcal/mol for ring molecules in category $r_e$ .                                   | –S8 |
| 9. Table S5. Cartesian coordinates of optimized geometry of rings at M06L/6-311++G(d,p) level. Atomic number followed by X, Y, Z coordinates in Å. | –S8 |

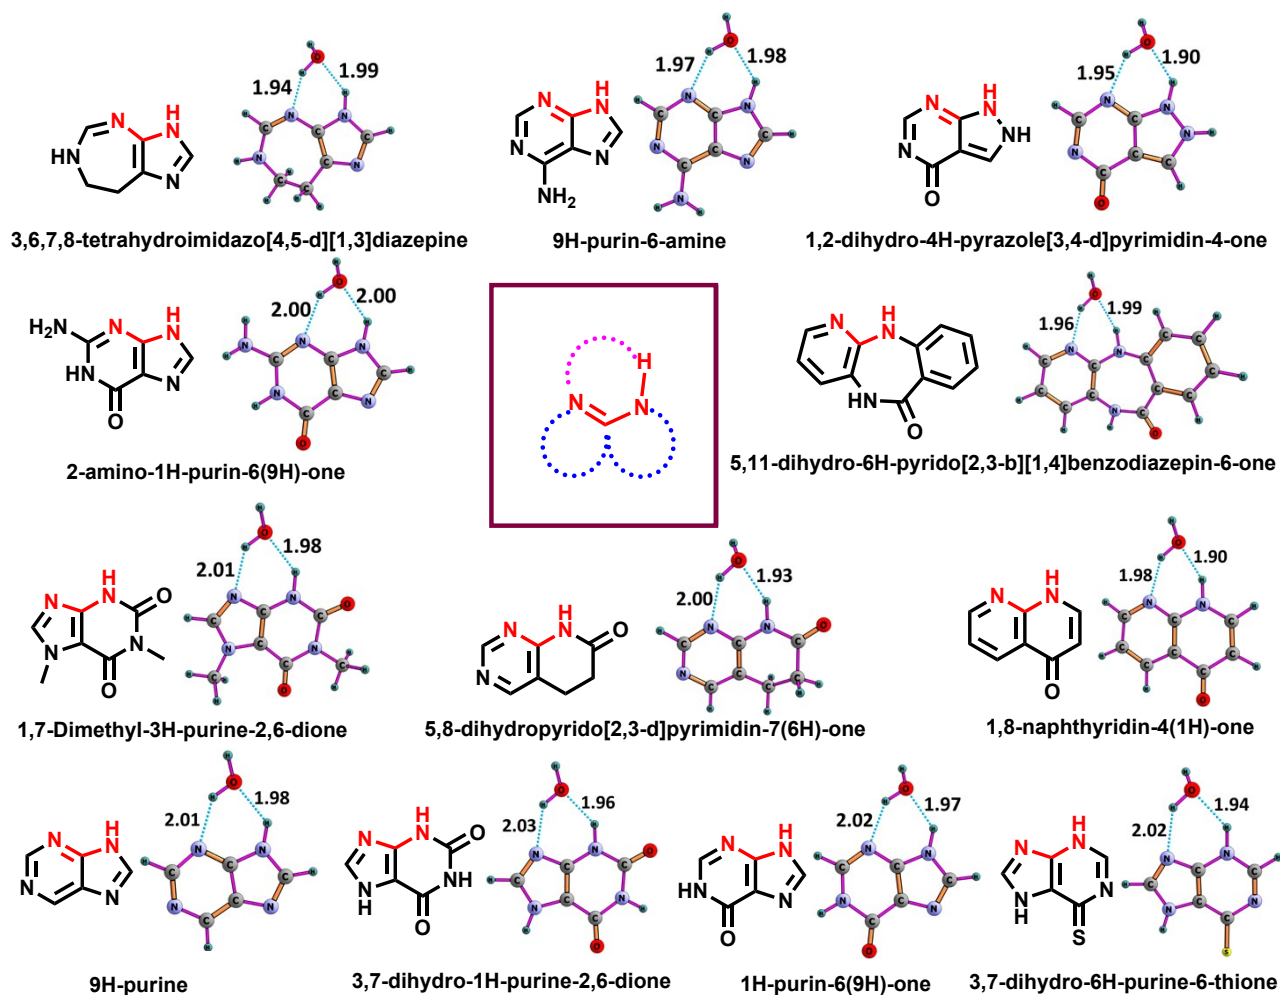

**Figure S1.** Dataset of ring systems in  $r_b$  category (CN<sup>-</sup>HN motif) and their ring...H<sub>2</sub>O complex

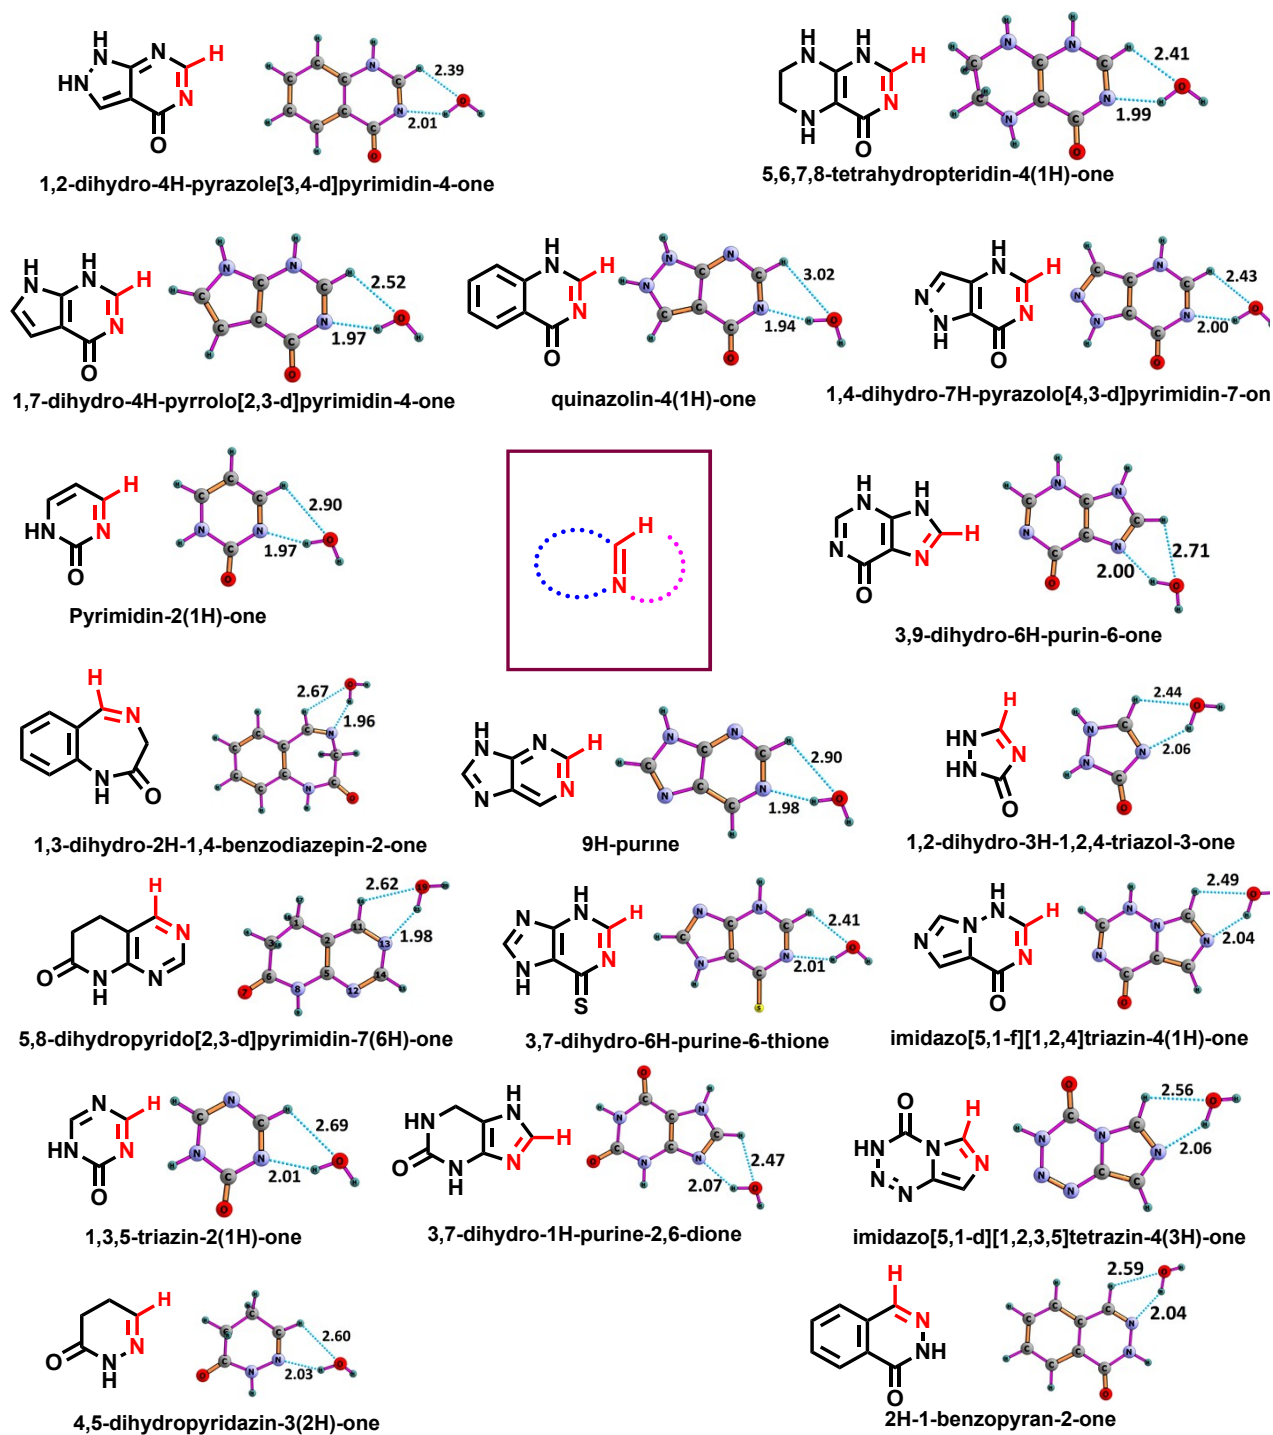

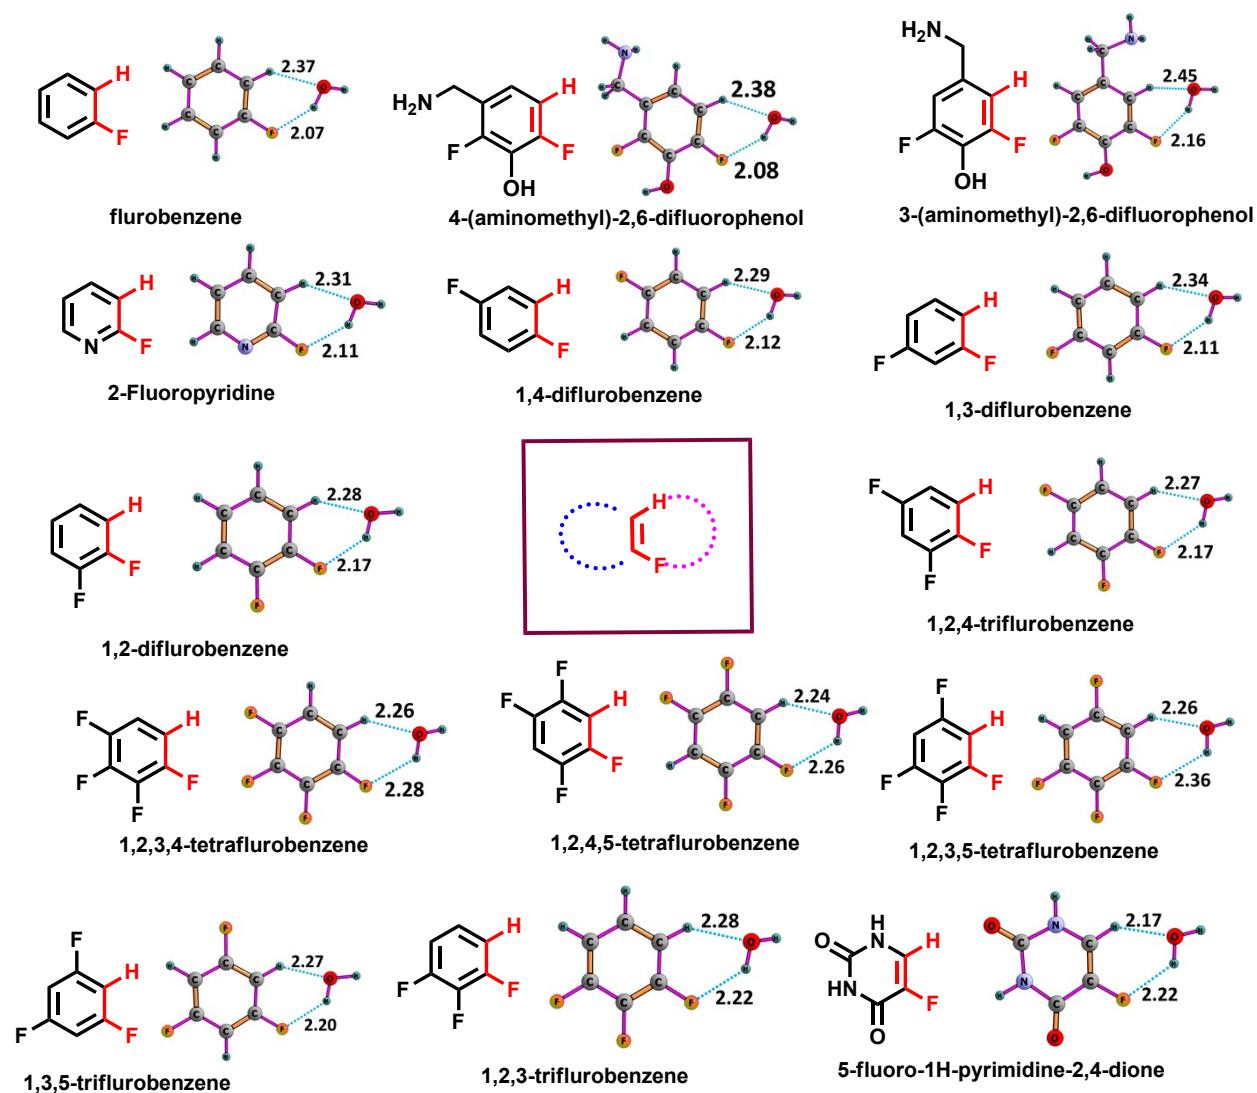

**Figure S3.** Dataset of ring systems in  $r_d$  category (CF<sup>-</sup>HC motif) and their ring...H<sub>2</sub>O complex

Fi

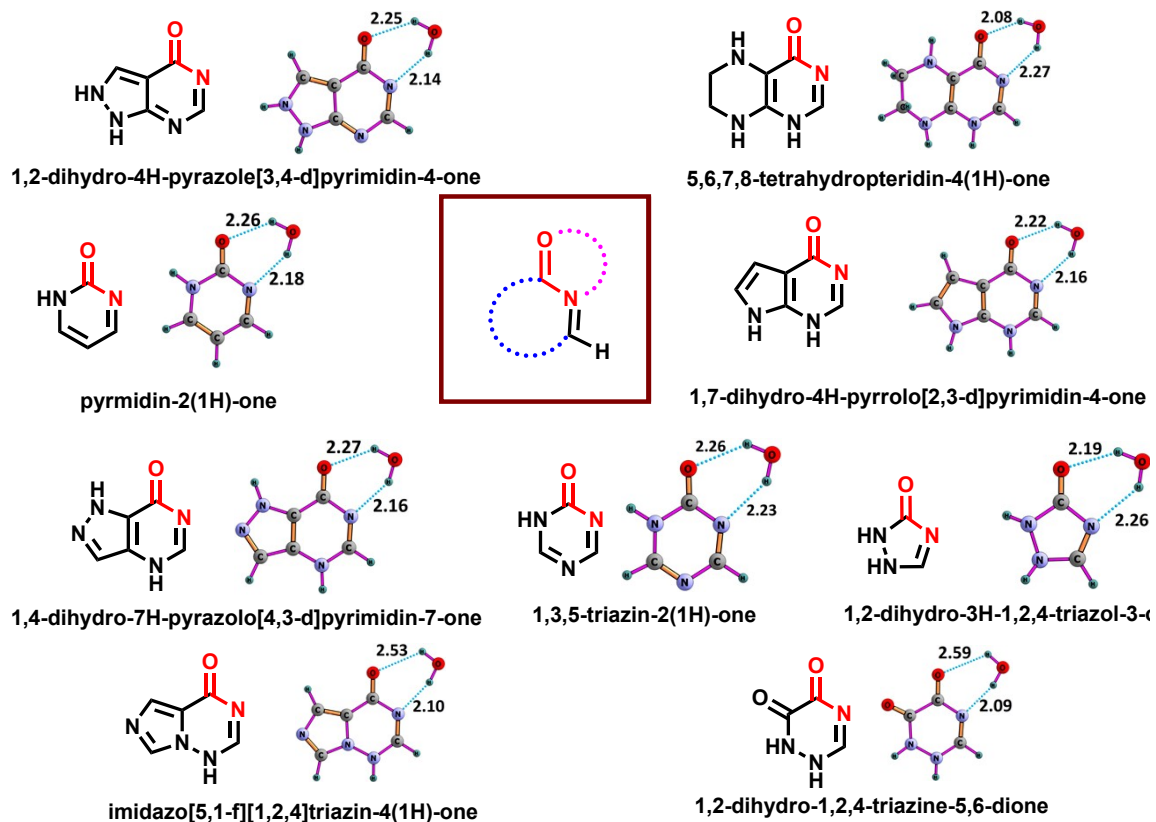

**Table S1.** MESP topology data and hydrogen bond energy data in kcal/mol for ring molecules in category  $r_b$ .

| Label     | Ring                                                  | $\Delta V_{n(CN)}$ | $\Delta V_{n(NH)}$ | $E_{int}$ | $\Delta E_{int}$ |
|-----------|-------------------------------------------------------|--------------------|--------------------|-----------|------------------|
| $r_{b1}$  | 3,6,7,8-tetrahydroimidazo[4,5-d][1,3]diazepine        | 15.3               | 15.8               | -10.5     | 0.7              |
| $r_{b2}$  | 9H-purin-6-amine                                      | 20.6               | 32.8               | -11.4     | -0.3             |
| $r_{b3}$  | 1,2-dihydro-4H-pyrazole[3,4-d]pyrimidin-4-one         | 22.0               | 49.3               | -15.0     | -3.9             |
| $r_{b4}$  | 2-amino-1H-purin-6(9H)-one                            | 28.3               | 31.1               | -9.4      | 1.7              |
| $r_{b5}$  | 5,11-dihydro-6H-pyrido[2,3-b][1,4]benzodiazepin-6-one | 28.4               | 7.0                | -9.3      | 1.8              |
| $r_{b6}$  | 1,7-Dimethyl-3H-purine-2,6-dione                      | 30.3               | 26.5               | -9.5      | 1.7              |
| $r_{b7}$  | 1,7-Dimethyl-3H-purine-2,6-dione                      | 33.5               | 22.3               | -8.9      | 2.3              |
| $r_{b8}$  | 5,8-dihydropyrido[2,3-d]pyrimidin-7(6H)-one           | 33.7               | 29.4               | -10.5     | 0.6              |
| $r_{b9}$  | 1,8-naphthyridin-4(1H)-one                            | 34.4               | 40.2               | -11.0     | 0.1              |
| $r_{b10}$ | 9H-purine                                             | 36.3               | 30.9               | -9.4      | 1.7              |
| $r_{b11}$ | 3,7-dihydro-1H-purine-2,6-dione                       | 37.3               | 37.7               | -10.3     | 0.9              |
| $r_{b12}$ | 1H-purin-6(9H)-one                                    | 37.7               | 43.1               | -11.0     | 0.1              |
| $r_{b12}$ | 3,7-dihydro-6H-purine-6-thione                        |                    |                    |           |                  |

**Table S2.** MESP topology data and hydrogen bond energy data in kcal/mol for ring molecules in category  $r_c$ .

| Label     | Ring                                          | $\Delta V_{n(CN)}$ | $\Delta V_{n(CH)}$ | $E_{int}$ | $\Delta E_{int}$ |
|-----------|-----------------------------------------------|--------------------|--------------------|-----------|------------------|
| $r_{c1}$  | 1,2-dihydro-4H-pyrazole[3,4-d]pyrimidin-4-one | -14.9              | -10.4              | -7.6      | -1.2             |
| $r_{c2}$  | 5,6,7,8-tetrahydropteridin-4(1H)-one          | -9.5               | 13.7               | -8.0      | -1.7             |
| $r_{c3}$  | 1,7-dihydro-4H-pyrrolo[2,3-d]pyrimidin-4-one  | -7.2               | 17.3               | -8.2      | -1.8             |
| $r_{c4}$  | quinazolin-4(1H)-one                          | -3.3               | 19.9               | -7.8      | -1.4             |
| $r_{c5}$  | 1,4-dihydro-7H-pyrazolo[4,3-d]pyrimidin-7-one | 2.2                | 23.3               | -7.6      | -1.2             |
| $r_{c6}$  | Pyrimidin-2(1H)-one                           | 3.1                | 5.9                | -7.1      | -0.7             |
| $r_{c7}$  | 3,9-dihydro-6H-purin-6-one                    | 3.6                | 26.5               | -7.3      | -0.9             |
| $r_{c8}$  | 1,3-dihydro-2H-1,4-benzodiazepin-2-one        | 3.9                | 1.9                | -6.5      | -0.2             |
| $r_{c9}$  | 9H-purine                                     | 3.9                | -3.3               | -6.0      | 0.4              |
| $r_{c10}$ | 1,2-dihydro-3H-1,2,4-triazol-3-one            | 4.3                | 34.5               | -6.9      | -0.5             |
| $r_{c11}$ | 5,8-dihydropyrido[2,3-d]pyrimidin-7(6H)-one   | 5.5                | 8.0                | -6.4      | 0.0              |
| $r_{c12}$ | 3,7-dihydro-6H-purine-6-thione                | 7.5                | 24.1               | -7.6      | -1.2             |
| $r_{c13}$ | imidazo[5,1-f][1,2,4]triazin-4(1H)-one        | 7.7                | 34.9               | -6.8      | -0.4             |
| $r_{c14}$ | 1,3,5-triazin-2(1H)-one                       | 11.4               | 9.8                | -6.1      | 0.3              |
| $r_{c15}$ | 3,7-dihydro-1H-purine-2,6-dione               | 13.5               | 33.5               | -5.7      | 0.7              |
| $r_{c16}$ | imidazo[5,1-d][1,2,3,5]tetrazin-4(3H)-one     | 15.8               | 32.3               | -5.5      | 0.8              |
| $r_{c17}$ | 4,5-dihydropyridazin-3(2H)-one                | 28.0               | 8.6                | -5.2      | 1.2              |
| $r_{c18}$ | 2H-1-benzopyran-2-one                         | 33.8               | 10.2               | -4.8      | 1.6              |

**Table S3.** MESP topology data and hydrogen bond energy data in kcal/mol for ring molecules in category  $r_d$ .

| Label     | Ring                               | $\Delta V_{n(CF)}$ | $\Delta V_{n(CH)}$ | $E_{int}$ | $\Delta E_{int}$ |
|-----------|------------------------------------|--------------------|--------------------|-----------|------------------|
| $r_{d1}$  | Fluorobenzene                      | -1.6               | -2.2               | -3.2      | -0.2             |
| $r_{d2}$  | 4-(aminomethyl)-2,6-difluorophenol | -0.7               | -6.5               | -2.7      | 0.2              |
| $r_{d3}$  | 3-(aminomethyl)-2,6-difluorophenol | -0.4               | -3.3               | -3.1      | -0.1             |
| $r_{d4}$  | 2-Fluoropyridine                   | 0.8                | 6.0                | -3.5      | -0.6             |
| $r_{d5}$  | 14-difluorobenzene                 | 2.1                | 4.4                | -3.4      | -0.4             |
| $r_{d6}$  | 13-difluorobenzene                 | 4.7                | 2.3                | -3.0      | 0.0              |
| $r_{d7}$  | 12-difluorobenzene                 | 6.7                | 4.2                | -3.2      | -0.2             |
| $r_{d8}$  | 124-trifluorobenzene               | 10.2               | 10.7               | -3.3      | -0.4             |
| $r_{d9}$  | 135-trifluorobenzene               | 10.8               | 14.1               | -3.0      | -0.1             |
| $r_{d10}$ | 123-trifluorobenzene               | 12.4               | 8.1                | -3.1      | -0.2             |
| $r_{d11}$ | 5-fluoro-1H-pyrimidine-2,4-dione   | 14.0               | 34.6               | -4.9      | -2.0             |
| $r_{d12}$ | 1234-tetrafluorobenzene            | 15.4               | 14.4               | -3.4      | -0.4             |
| $r_{d13}$ | 1245-tetrafluorobenzene            | 15.9               | 22.3               | -3.5      | -0.6             |
| $r_{d14}$ | 1235-tetrafluorobenzene            | 18.5               | 19.9               | -3.3      | -0.3             |

**Table S4.** MESP topology data and hydrogen bond energy data in kcal/mol for ring molecules

| Label    | Ring                                          | $\Delta V_{n(CN)}$ | $\Delta V_{n(CO)}$ | $E_{int}$ | $\Delta E_{int}$ |
|----------|-----------------------------------------------|--------------------|--------------------|-----------|------------------|
| $r_{e1}$ | 1,2-dihydro-4H-pyrazole[3,4-d]pyrimidin-4-one | -34.4              | -35.8              | -8.4      | -3.0             |
| $r_{e2}$ | 5,6,7,8-tetrahydropteridin-4(1H)-one          | -29.1              | -45.7              | -8.6      | -3.2             |
| $r_{e3}$ | 1,7-dihydro-4H-pyrrolo[2,3-d]pyrimidin-4-one  | -26.8              | -42.5              | -8.3      | -2.9             |
| $r_{e4}$ | 1,4-dihydro-7H-pyrazolo[4,3-d]pyrimidin-7-one | -17.4              | -28.2              | -7.3      | -1.9             |
| $r_{e5}$ | pyrimidin-2-on                                | -16.7              | -30.6              | -7.2      | -1.9             |
| $r_{e6}$ | 1,2-dihydro-3H-1,2,4-triazol-3-one            | -15.3              | -26.1              | -6.6      | -1.2             |
| $r_{e7}$ | imidazo[5,1-f][1,2,4]triazin-4(1H)-one        | -11.0              | -21.2              | -6.7      | -1.3             |
| $r_{e8}$ | 1,2-dihydro-1,2,4-triazine-5,6-dione          | -9.9               | -16.0              | -6.5      | -1.1             |
| $r_{e9}$ | 1,3,5-triazin-2(1H)-one                       | -8.1               | -16.9              | -6.2      | -0.8             |

in category  $r_e$ .

**Table S5.** Cartesian coordinates of optimized geometry of rings at M06L/6-311++G(d,p) level. Atomic number followed by X, Y, Z coordinates in Å.

| $r_{a1}$ |              |             |              | $r_{a2}$ |              |              |              |
|----------|--------------|-------------|--------------|----------|--------------|--------------|--------------|
| 6        | -1.045850000 | 1.189032000 | -0.000027000 | 6        | 0.790103000  | -1.206263000 | -0.000116000 |
| 6        | 0.306667000  | 1.221422000 | 0.000048000  | 6        | -0.494836000 | -0.711123000 | -0.000009000 |
| 7        | -1.725157000 | 0.000019000 | -0.000008000 | 6        | 1.914401000  | -0.317035000 | 0.000036000  |

|   |              |                       |              |   |              |                       |              |
|---|--------------|-----------------------|--------------|---|--------------|-----------------------|--------------|
| 1 | -2.731485000 | 0.000036000           | -0.000081000 | 8 | 3.105525000  | -0.599693000          | 0.000054000  |
| 6 | 1.108533000  | 0.000011000           | -0.000006000 | 6 | -0.747897000 | 0.696800000           | 0.000024000  |
| 6 | -1.045901000 | -1.189059000          | 0.000030000  | 7 | 1.540070000  | 1.065071000           | 0.000086000  |
| 8 | 2.339070000  | -0.000041000          | -0.000026000 | 1 | 2.335839000  | 1.690145000           | 0.000195000  |
| 1 | -1.664497000 | -2.079201000          | 0.000021000  | 6 | 0.287660000  | 1.587051000           | -0.000058000 |
| 6 | 0.306616000  | -1.221404000          | 0.000004000  | 1 | 1.000771000  | -2.268379000          | -0.000335000 |
| 1 | -1.664350000 | 2.079244000           | -0.000057000 | 6 | -1.808409000 | -1.284000000          | 0.000093000  |
| 1 | 0.821795000  | -2.174395000          | -0.000015000 | 7 | -2.118339000 | 0.833750000           | -0.000616000 |
| 1 | 0.821685000  | 2.174500000           | 0.000099000  | 7 | -2.744082000 | -0.359972000          | 0.000208000  |
|   |              |                       |              | 1 | 0.189123000  | 2.665788000           | -0.000182000 |
|   |              |                       |              | 1 | -2.672234000 | 1.672793000           | 0.002232000  |
|   |              |                       |              | 1 | -2.087380000 | -2.327326000          | 0.000103000  |
|   |              |                       |              |   |              |                       |              |
|   |              | <b>r<sub>a3</sub></b> |              |   |              | <b>r<sub>a4</sub></b> |              |
| 6 | -1.369898000 | -0.967750000          | -0.000268000 | 6 | -1.356727000 | 0.974907000           | 0.000008000  |
| 6 | 0.032798000  | -0.495734000          | 0.000214000  | 6 | 0.060619000  | 0.507696000           | -0.000010000 |
| 6 | -2.359346000 | 0.093345000           | 0.000526000  | 6 | -2.334583000 | -0.103681000          | -0.000058000 |
| 1 | -3.407206000 | -0.178003000          | 0.001096000  | 1 | -3.383588000 | 0.163716000           | -0.000043000 |
| 6 | 0.342360000  | 0.877700000           | -0.000145000 | 6 | 0.359478000  | -0.872781000          | 0.000010000  |
| 6 | -1.998644000 | 1.399892000           | 0.000431000  | 6 | -1.974039000 | -1.407777000          | -0.000015000 |
| 1 | -2.723077000 | 2.207108000           | 0.000755000  | 1 | -2.694470000 | -2.218458000          | -0.000024000 |
| 7 | -0.693158000 | 1.793407000           | -0.000681000 | 7 | -0.664472000 | -1.796424000          | -0.000008000 |
| 1 | -0.470233000 | 2.775996000           | 0.001796000  | 1 | -0.435031000 | -2.778126000          | 0.000081000  |
| 8 | -1.654989000 | -2.164093000          | -0.000700000 | 8 | -1.663431000 | 2.158357000           | 0.000079000  |
| 6 | 1.087107000  | -1.416956000          | 0.000325000  | 7 | 1.031226000  | 1.433295000           | -0.000042000 |
| 6 | 1.676319000  | 1.308056000           | -0.000422000 | 6 | 1.698245000  | -1.281307000          | 0.000037000  |
| 6 | 2.402044000  | -0.996034000          | 0.000468000  | 6 | 2.291019000  | 1.033063000           | -0.000056000 |
| 6 | 2.693399000  | 0.374230000           | -0.000017000 | 6 | 2.677938000  | -0.313952000          | 0.000019000  |
| 1 | 0.821169000  | -2.469194000          | 0.000408000  | 1 | 3.046921000  | 1.816361000           | -0.000045000 |
| 1 | 3.210519000  | -1.719277000          | 0.000912000  | 1 | 3.727805000  | -0.586039000          | 0.000069000  |
| 1 | 3.725324000  | 0.710002000           | -0.000251000 | 1 | 1.946832000  | -2.339418000          | 0.000084000  |
| 1 | 1.898679000  | 2.371761000           | -0.001031000 |   |              |                       |              |
|   |              |                       |              |   |              |                       |              |
|   |              | <b>r<sub>a5</sub></b> |              |   |              | <b>r<sub>a6</sub></b> |              |
| 6 | -0.279167000 | 1.648005000           | 0.000141000  | 6 | -1.115999000 | -1.132072000          | 0.000000000  |
| 6 | 0.741584000  | 0.688385000           | -0.000180000 | 7 | -1.136694000 | 0.225918000           | 0.000000000  |
| 6 | -1.568032000 | 1.193836000           | 0.000347000  | 6 | 0.070029000  | -1.799832000          | 0.000000000  |
| 1 | -2.405231000 | 1.879964000           | 0.000522000  | 1 | -2.020263000 | 0.719264000           | 0.000000000  |
| 6 | 0.483964000  | -0.666926000          | -0.000053000 | 1 | 0.086299000  | -2.880904000          | 0.000000000  |
| 6 | -1.920241000 | -0.216433000          | -0.000030000 | 6 | 0.000000000  | 1.068929000           | 0.000000000  |
| 7 | -0.811602000 | -1.092401000          | 0.000321000  | 6 | 1.264533000  | -1.034476000          | 0.000000000  |
| 8 | 2.089613000  | 0.904539000           | -0.000300000 | 8 | -0.143509000 | 2.281582000           | 0.000000000  |
| 6 | 1.742823000  | -1.325970000          | 0.000294000  | 1 | 2.221204000  | -1.549764000          | 0.000000000  |
| 6 | 2.665691000  | -0.322378000          | -0.000050000 | 6 | 1.239641000  | 0.328718000           | 0.000000000  |
| 1 | -1.039651000 | -2.077419000          | -0.000477000 | 1 | -2.080600000 | -1.627232000          | 0.000000000  |
| 1 | -0.049278000 | 2.708451000           | 0.000111000  | 1 | 2.149072000  | 0.916948000           | 0.000000000  |
| 8 | -3.054310000 | -0.672557000          | -0.000380000 |   |              |                       |              |
| 1 | 1.949514000  | -2.384572000          | 0.000373000  |   |              |                       |              |
| 1 | 3.743700000  | -0.326586000          | -0.000151000 |   |              |                       |              |
|   |              |                       |              |   |              |                       |              |
|   |              | <b>r<sub>a7</sub></b> |              |   |              | <b>r<sub>a8</sub></b> |              |
| 6 | 0.844256000  | 0.067112000           | 0.033594000  | 6 | -1.375709000 | 0.958728000           | -0.000348000 |
| 6 | -0.074691000 | 1.195096000           | 0.028107000  | 6 | 0.035295000  | 0.514500000           | -0.000088000 |
| 7 | -0.002481000 | -1.069063000          | 0.119070000  | 6 | -2.336468000 | -0.129015000          | 0.000160000  |
| 6 | -1.330005000 | 0.703983000           | -0.027926000 | 1 | -3.391237000 | 0.113733000           | 0.000436000  |
| 7 | -1.329728000 | -0.674333000          | -0.123360000 | 6 | 0.379795000  | -0.849116000          | -0.000067000 |
| 1 | -2.282176000 | 1.217363000           | -0.017304000 | 6 | -1.941604000 | -1.426522000          | 0.000129000  |
| 1 | 0.228210000  | 2.228821000           | 0.013618000  | 1 | -2.646157000 | -2.250627000          | 0.000280000  |
| 8 | 2.056061000  | 0.001167000           | -0.030764000 | 7 | -0.627088000 | -1.788409000          | -0.000119000 |
| 1 | 0.285498000  | -1.890141000          | -0.399340000 | 1 | -0.344266000 | -2.757630000          | -0.000077000 |
| 1 | -1.991916000 | -1.158755000          | 0.476518000  | 8 | -1.681585000 | 2.149002000           | 0.000033000  |
|   |              |                       |              | 6 | 1.092344000  | 1.426352000           | 0.000031000  |
|   |              |                       |              | 7 | 1.630394000  | -1.324972000          | -0.000036000 |
|   |              |                       |              | 6 | 2.393248000  | 0.960232000           | 0.000117000  |
|   |              |                       |              | 6 | 2.604310000  | -0.422514000          | 0.000048000  |
|   |              |                       |              | 1 | 3.239152000  | 1.638027000           | 0.000197000  |
|   |              |                       |              | 1 | 3.616593000  | -0.822175000          | 0.000073000  |
|   |              |                       |              | 1 | 0.848183000  | 2.484450000           | 0.000028000  |



|                                                                |              |              |              |                                                                |              |              |              |
|----------------------------------------------------------------|--------------|--------------|--------------|----------------------------------------------------------------|--------------|--------------|--------------|
| <p style="text-align: center;"><b><math>r_{a9}</math></b></p>  |              |              |              | <p style="text-align: center;"><b><math>r_{a10}</math></b></p> |              |              |              |
| 7                                                              | 0.079878000  | 1.091379000  | 0.087254000  | 6                                                              | 0.488371000  | -1.545177000 | 0.000042000  |
| 6                                                              | -1.322248000 | 0.804640000  | -0.140520000 | 6                                                              | -0.508512000 | -0.611604000 | 0.000108000  |
| 6                                                              | 0.902559000  | -0.003189000 | 0.008589000  | 7                                                              | 1.771545000  | -1.112961000 | 0.000008000  |
| 6                                                              | -1.401344000 | -0.689358000 | 0.193334000  | 1                                                              | 2.524311000  | -1.790350000 | 0.000057000  |
| 6                                                              | -0.008462000 | -1.211718000 | -0.140305000 | 6                                                              | -0.164068000 | 0.777621000  | 0.000073000  |
| 1                                                              | -1.609766000 | 1.001288000  | -1.183726000 | 6                                                              | 2.225098000  | 0.240863000  | 0.000054000  |
| 1                                                              | 0.067993000  | -1.550705000 | -1.179689000 | 6                                                              | 1.148373000  | 1.189933000  | 0.000106000  |
| 1                                                              | 0.334744000  | -2.034827000 | 0.486886000  | 16                                                             | -2.249879000 | -0.766711000 | -0.000033000 |
| 1                                                              | -2.204815000 | -1.192151000 | -0.346695000 | 6                                                              | -1.380090000 | 1.550187000  | 0.000004000  |
| 8                                                              | 2.115248000  | 0.013919000  | 0.038219000  | 7                                                              | -2.503794000 | 0.896435000  | -0.000137000 |
| 1                                                              | -1.599056000 | -0.810614000 | 1.262303000  | 1                                                              | 1.416506000  | 2.239396000  | 0.000182000  |
| 1                                                              | -1.964732000 | 1.415229000  | 0.499440000  | 1                                                              | 0.327127000  | -2.616642000 | 0.000063000  |
| 1                                                              | 0.471470000  | 2.018521000  | 0.018363000  | 8                                                              | 3.426798000  | 0.462948000  | -0.000180000 |
|                                                                |              |              |              | 1                                                              | -1.413540000 | 2.636129000  | 0.000234000  |
| <p style="text-align: center;"><b><math>r_{a11}</math></b></p> |              |              |              | <p style="text-align: center;"><b><math>r_{a12}</math></b></p> |              |              |              |
| 6                                                              | 0.625618000  | 1.601024000  | 0.000016000  | 6                                                              | 1.458144000  | 0.908241000  | 0.032160000  |
| 6                                                              | -0.489095000 | 0.783534000  | 0.000006000  | 7                                                              | 0.116709000  | 0.396945000  | -0.013437000 |
| 7                                                              | 1.852961000  | 1.059865000  | 0.000015000  | 6                                                              | 2.449907000  | -0.123615000 | -0.013100000 |
| 1                                                              | 2.668158000  | 1.661634000  | 0.000022000  | 1                                                              | 3.488852000  | 0.180463000  | -0.004617000 |
| 6                                                              | -0.263858000 | -0.638078000 | -0.000007000 | 6                                                              | -0.148059000 | -0.941710000 | -0.021941000 |
| 6                                                              | 2.179190000  | -0.339256000 | 0.000003000  | 6                                                              | 2.073943000  | -1.430266000 | -0.040672000 |
| 8                                                              | 3.356342000  | -0.663527000 | 0.000005000  | 1                                                              | 2.823999000  | -2.218516000 | -0.061664000 |
| 6                                                              | 1.013386000  | -1.163854000 | -0.000008000 | 7                                                              | 0.785108000  | -1.861352000 | -0.033755000 |
| 1                                                              | 1.169732000  | -2.236674000 | -0.000017000 | 8                                                              | 1.637820000  | 2.113405000  | 0.101389000  |
| 1                                                              | 0.558210000  | 2.684280000  | 0.000026000  | 6                                                              | -0.928265000 | 1.437446000  | 0.024372000  |
| 6                                                              | -1.829321000 | 1.255899000  | 0.000007000  | 6                                                              | -1.573123000 | -1.417511000 | -0.044678000 |
| 6                                                              | -1.443798000 | -1.460091000 | -0.000018000 | 6                                                              | -2.291609000 | 0.916913000  | -0.366546000 |
| 6                                                              | -2.850500000 | 0.354558000  | -0.000005000 | 6                                                              | -2.591837000 | -0.373722000 | 0.373018000  |
| 7                                                              | -2.662520000 | -1.006000000 | -0.000017000 | 1                                                              | -0.939947000 | 1.852122000  | 1.039436000  |
| 1                                                              | -2.027495000 | 2.323643000  | 0.000016000  | 1                                                              | -3.032372000 | 1.691789000  | -0.152601000 |
| 1                                                              | -3.886109000 | 0.679436000  | -0.000004000 | 1                                                              | -2.538390000 | -0.201037000 | 1.455213000  |
| 1                                                              | -1.316050000 | -2.543576000 | -0.000028000 | 1                                                              | -1.615780000 | -2.322937000 | 0.564175000  |
|                                                                |              |              |              | 1                                                              | -2.329607000 | 0.738025000  | -1.448404000 |
|                                                                |              |              |              | 1                                                              | -3.603566000 | -0.730380000 | 0.164383000  |
|                                                                |              |              |              | 1                                                              | -1.779442000 | -1.747788000 | -1.071437000 |
|                                                                |              |              |              | 1                                                              | -0.583634000 | 2.247212000  | -0.620927000 |
| <p style="text-align: center;"><b><math>r_{a13}</math></b></p> |              |              |              | <p style="text-align: center;"><b><math>r_{a14}</math></b></p> |              |              |              |
| 6                                                              | 1.446530000  | 0.117555000  | -0.000539000 | 6                                                              | 1.075873000  | 1.428174000  | -0.000077000 |
| 7                                                              | 0.280549000  | 0.994033000  | 0.000778000  | 6                                                              | 0.022715000  | 0.505036000  | 0.000027000  |
| 6                                                              | -0.650442000 | -0.015607000 | 0.000332000  | 6                                                              | 2.388761000  | 1.000555000  | -0.000066000 |
| 6                                                              | 0.464702000  | -1.067311000 | 0.000394000  | 1                                                              | 3.199088000  | 1.721652000  | -0.000560000 |
| 1                                                              | 2.074621000  | 0.207674000  | 0.890733000  | 6                                                              | 0.338559000  | -0.857610000 | 0.000261000  |
| 1                                                              | 2.071532000  | 0.207368000  | -0.894120000 | 6                                                              | 2.676940000  | -0.369826000 | -0.000273000 |
| 1                                                              | 0.482150000  | -1.698253000 | -0.888653000 | 1                                                              | 3.708256000  | -0.706941000 | -0.000338000 |
| 1                                                              | 0.481895000  | -1.697686000 | 0.889795000  | 6                                                              | 1.657894000  | -1.304893000 | 0.000046000  |
| 8                                                              | -1.853173000 | -0.023313000 | -0.000496000 | 1                                                              | 1.856306000  | -2.370659000 | 0.000515000  |
| 1                                                              | 0.186604000  | 2.001359000  | -0.000352000 | 1                                                              | 0.813417000  | 2.481215000  | 0.000068000  |
|                                                                |              |              |              | 6                                                              | -1.383893000 | 0.950908000  | 0.000004000  |
|                                                                |              |              |              | 8                                                              | -0.633775000 | -1.824855000 | 0.000495000  |
|                                                                |              |              |              | 6                                                              | -2.334337000 | -0.150095000 | -0.000504000 |
|                                                                |              |              |              | 6                                                              | -1.922471000 | -1.430409000 | -0.000330000 |
|                                                                |              |              |              | 1                                                              | -2.583956000 | -2.288755000 | -0.000548000 |
|                                                                |              |              |              | 1                                                              | -3.394753000 | 0.068430000  | -0.000706000 |
|                                                                |              |              |              | 8                                                              | -1.706052000 | 2.132857000  | 0.000385000  |
| <p style="text-align: center;"><b><math>r_{a15}</math></b></p> |              |              |              | <p style="text-align: center;"><b><math>r_{a16}</math></b></p> |              |              |              |
| 6                                                              | 1.021014000  | 1.186728000  | 0.000015000  | 6                                                              | -1.830817000 | 1.248762000  | 0.013738000  |
| 6                                                              | -0.258862000 | 0.681320000  | 0.000004000  | 6                                                              | -0.525994000 | 0.780908000  | 0.117161000  |
| 6                                                              | 2.155663000  | 0.314973000  | 0.000014000  | 6                                                              | -2.906314000 | 0.372220000  | -0.097638000 |
| 8                                                              | 3.343531000  | 0.588742000  | 0.000022000  | 1                                                              | -3.917185000 | 0.757311000  | -0.174624000 |
| 6                                                              | -0.462196000 | -0.750382000 | -0.000009000 | 6                                                              | -0.307189000 | -0.604044000 | 0.088472000  |
| 7                                                              | 1.755855000  | -1.055048000 | 0.000001000  | 6                                                              | -2.674696000 | -0.998859000 | -0.107954000 |
| 1                                                              | 2.522414000  | -1.722167000 | 0.000000000  | 1                                                              | -3.504342000 | -1.693037000 | -0.192496000 |
| 7                                                              | 0.558916000  | -1.600594000 | -0.000010000 | 6                                                              | -1.378412000 | -1.489662000 | -0.020411000 |
| 1                                                              | 1.204539000  | 2.255894000  | 0.000024000  | 1                                                              | -1.190623000 | -2.559566000 | -0.039899000 |
| 6                                                              | -1.436906000 | 1.493749000  | 0.000005000  | 1                                                              | -2.003944000 | 2.321747000  | 0.029847000  |

|   |              |                             |              |   |              |                             |              |
|---|--------------|-----------------------------|--------------|---|--------------|-----------------------------|--------------|
| 7 | -1.698449000 | -1.335414000                | -0.000020000 | 6 | 0.666588000  | 1.670941000                 | 0.302926000  |
| 6 | -2.653083000 | 0.890721000                 | -0.000006000 | 7 | 1.006672000  | -1.080546000                | 0.192640000  |
| 6 | -2.728754000 | -0.539844000                | -0.000019000 | 6 | 1.891857000  | 1.100543000                 | -0.400298000 |
| 1 | -1.333262000 | 2.574694000                 | 0.000014000  | 6 | 2.150415000  | -0.345789000                | -0.048635000 |
| 1 | -3.568896000 | 1.471846000                 | -0.000006000 | 1 | 1.154604000  | -2.072667000                | 0.322715000  |
| 1 | -3.708553000 | -1.016398000                | -0.000028000 | 8 | 3.252286000  | -0.856352000                | -0.004143000 |
|   |              |                             |              | 1 | 2.799416000  | 1.664725000                 | -0.182841000 |
|   |              |                             |              | 1 | 1.751004000  | 1.138129000                 | -1.488659000 |
|   |              |                             |              | 1 | 0.453098000  | 2.683232000                 | -0.050963000 |
|   |              |                             |              | 1 | 0.880357000  | 1.764645000                 | 1.377422000  |
|   |              |                             |              |   |              |                             |              |
|   |              | <b><math>r_{a17}</math></b> |              |   |              | <b><math>r_{a18}</math></b> |              |
| 6 | -1.201404000 | -1.149051000                | -0.000014000 | 6 | -1.019852000 | -1.195041000                | 0.000015000  |
| 6 | 0.279348000  | -1.265735000                | 0.000102000  | 6 | 0.268983000  | -0.697328000                | 0.000004000  |
| 6 | -1.812534000 | 0.046346000                 | -0.000089000 | 6 | -2.163213000 | -0.343489000                | 0.000015000  |
| 1 | 0.613930000  | -1.861018000                | -0.860173000 | 8 | -3.347384000 | -0.629035000                | 0.000022000  |
| 1 | -2.895156000 | 0.115480000                 | -0.000206000 | 6 | 0.511947000  | 0.718002000                 | -0.000009000 |
| 6 | 1.079869000  | 0.028797000                 | 0.000016000  | 7 | -1.808887000 | 1.063457000                 | 0.000001000  |
| 6 | -1.037168000 | 1.268243000                 | 0.000016000  | 1 | -2.615056000 | 1.678717000                 | 0.000001000  |
| 8 | 2.300733000  | 0.006642000                 | -0.000129000 | 6 | -0.580447000 | 1.573717000                 | -0.000010000 |
| 1 | -1.575265000 | 2.213413000                 | 0.000006000  | 1 | -0.453299000 | 2.651467000                 | -0.000019000 |
| 6 | 0.314712000  | 1.273028000                 | 0.000096000  | 1 | -1.204810000 | -2.262935000                | 0.000024000  |
| 1 | -1.783963000 | -2.066550000                | -0.000045000 | 6 | 1.460747000  | -1.476921000                | 0.000005000  |
| 1 | 0.883835000  | 2.196625000                 | 0.000147000  | 7 | 1.753379000  | 1.296012000                 | -0.000020000 |
| 1 | 0.613825000  | -1.860858000                | 0.860540000  | 6 | 2.654062000  | -0.824704000                | -0.000007000 |
|   |              |                             |              | 7 | 2.806057000  | 0.549684000                 | -0.000020000 |
|   |              |                             |              | 1 | 1.408781000  | -2.561319000                | 0.000014000  |
|   |              |                             |              | 1 | 3.596248000  | -1.363141000                | -0.000007000 |
|   |              |                             |              |   |              |                             |              |
|   |              | <b><math>r_{a19}</math></b> |              |   |              | <b><math>r_{a20}</math></b> |              |
| 6 | 1.307929000  | -1.423277000                | 0.000000000  | 6 | -1.294528000 | -0.344409000                | -0.000069000 |
| 6 | 0.151991000  | -0.658663000                | -0.000359000 | 7 | -0.033022000 | -0.980768000                | -0.000104000 |
| 6 | 2.528712000  | -0.748303000                | 0.000312000  | 6 | 1.222930000  | -0.407935000                | 0.000024000  |
| 1 | 3.450100000  | -1.321474000                | 0.000598000  | 7 | 1.171608000  | 0.984771000                 | -0.000464000 |
| 6 | 0.186449000  | 0.742326000                 | -0.000418000 | 6 | 0.005420000  | 1.702580000                 | 0.000044000  |
| 6 | 2.582434000  | 0.641612000                 | 0.000233000  | 6 | -1.201582000 | 1.103249000                 | 0.000312000  |
| 1 | 3.543925000  | 1.143684000                 | 0.000482000  | 1 | -0.046703000 | -1.992802000                | -0.000133000 |
| 6 | 1.405171000  | 1.394973000                 | -0.000145000 | 1 | 2.068264000  | 1.446627000                 | -0.000386000 |
| 1 | 1.267489000  | -2.507515000                | 0.000211000  | 1 | 0.124186000  | 2.780032000                 | 0.000223000  |
| 7 | -1.178007000 | -1.079117000                | -0.000712000 | 1 | -2.116527000 | 1.676411000                 | 0.000762000  |
| 6 | -1.222086000 | 1.245450000                 | -0.000032000 | 8 | 2.263001000  | -1.026245000                | 0.000315000  |
| 6 | -2.073453000 | -0.021239000                | -0.000066000 | 8 | -2.312095000 | -1.006155000                | -0.000108000 |
| 1 | 1.449281000  | 2.480137000                 | -0.000140000 |   |              |                             |              |
| 1 | -1.475780000 | 1.850369000                 | 0.875755000  |   |              |                             |              |
| 1 | -1.485754000 | -2.039592000                | 0.001151000  |   |              |                             |              |
| 8 | -3.278691000 | -0.117595000                | 0.000547000  |   |              |                             |              |
| 1 | -1.476557000 | 1.851709000                 | -0.874592000 |   |              |                             |              |
|   |              |                             |              |   |              |                             |              |
|   |              | <b><math>r_{a21}</math></b> |              |   |              | <b><math>r_{a22}</math></b> |              |
| 6 | -1.315142000 | 0.777373000                 | -0.000127000 | 6 | 1.259868000  | -0.445804000                | 0.023784000  |
| 6 | -0.051855000 | 1.199007000                 | 0.000073000  | 6 | 1.249089000  | 1.050669000                 | 0.206293000  |
| 6 | 0.841178000  | 0.026663000                 | 0.000058000  | 6 | -0.000001000 | 1.709460000                 | -0.357199000 |
| 8 | 0.041613000  | -1.096439000                | -0.000311000 | 6 | -1.249089000 | 1.050669000                 | 0.206294000  |
| 6 | -1.324993000 | -0.708068000                | 0.000198000  | 6 | -1.259868000 | -0.445804000                | 0.023787000  |
| 1 | -2.216984000 | 1.376479000                 | -0.000644000 | 7 | 0.000000000  | -1.040076000                | -0.061852000 |
| 1 | 0.323968000  | 2.211507000                 | -0.000017000 | 1 | 2.169126000  | 1.439158000                 | -0.233135000 |
| 8 | 2.037622000  | -0.040792000                | 0.000050000  | 1 | 1.323726000  | 1.236984000                 | 1.286051000  |
| 1 | -1.817444000 | -1.129510000                | 0.885082000  | 1 | -0.000001000 | 2.778831000                 | -0.133098000 |
| 1 | -1.818543000 | -1.130473000                | -0.883544000 | 1 | -0.000001000 | 1.624052000                 | -1.449914000 |
|   |              |                             |              | 1 | -2.169127000 | 1.439157000                 | -0.233133000 |
|   |              |                             |              | 1 | -1.323726000 | 1.236985000                 | 1.286053000  |
|   |              |                             |              | 1 | 0.000000000  | -2.048562000                | -0.172751000 |
|   |              |                             |              | 8 | 2.262224000  | -1.121326000                | -0.033428000 |
|   |              |                             |              | 8 | -2.262223000 | -1.121326000                | -0.033430000 |
|   |              |                             |              |   |              |                             |              |
|   |              | <b><math>r_{a23}</math></b> |              |   |              | <b><math>r_{a24}</math></b> |              |
| 7 | 0.695491000  | 1.120785000                 | -0.142257000 | 6 | 0.704532000  | 1.239527000                 | 0.021778000  |
| 7 | -0.695598000 | 1.120852000                 | 0.142259000  | 7 | -0.730317000 | 1.121398000                 | -0.064561000 |
| 6 | 1.197860000  | -0.176826000                | -0.039788000 | 6 | 1.166882000  | -0.211637000                | 0.002491000  |
| 6 | -1.197879000 | -0.176898000                | 0.039872000  | 6 | -1.166433000 | -0.176678000                | -0.009071000 |

|                             |              |              |              |                             |              |              |              |
|-----------------------------|--------------|--------------|--------------|-----------------------------|--------------|--------------|--------------|
| 6                           | -0.000058000 | -1.096407000 | -0.000188000 | 7                           | 0.007823000  | -0.954219000 | -0.013764000 |
| 1                           | 1.218833000  | 1.831128000  | 0.357664000  | 1                           | 1.047494000  | 1.717676000  | 0.946381000  |
| 1                           | -1.219231000 | 1.830414000  | -0.358513000 | 1                           | -1.377613000 | 1.873270000  | 0.102415000  |
| 1                           | -0.048644000 | -1.748814000 | -0.874396000 | 1                           | -0.019455000 | -1.962220000 | -0.020621000 |
| 1                           | 0.049326000  | -1.749185000 | 0.873590000  | 8                           | 2.301506000  | -0.618721000 | 0.004369000  |
| 8                           | -2.371410000 | -0.447184000 | -0.026190000 | 8                           | -2.297466000 | -0.592279000 | 0.026855000  |
| 8                           | 2.371526000  | -0.447093000 | 0.026473000  | 1                           | 1.144831000  | 1.781741000  | -0.820878000 |
| <b><math>r_{a25}</math></b> |              |              |              | <b><math>r_{a26}</math></b> |              |              |              |
| 6                           | 1.352599000  | 1.416847000  | 0.000171000  | 6                           | 1.465726000  | 1.395126000  | 0.000233000  |
| 6                           | 0.161109000  | 0.698569000  | 0.000213000  | 6                           | 0.255512000  | 0.702758000  | 0.000544000  |
| 6                           | 2.542719000  | 0.700904000  | -0.000185000 | 6                           | 2.665337000  | 0.697363000  | -0.000157000 |
| 1                           | 3.490846000  | 1.229528000  | -0.000449000 | 1                           | 3.606198000  | 1.238341000  | -0.000264000 |
| 6                           | 0.161098000  | -0.698570000 | 0.000192000  | 6                           | 0.255447000  | -0.702602000 | 0.000139000  |
| 6                           | 2.542706000  | -0.700910000 | -0.000204000 | 6                           | 2.665327000  | -0.697476000 | -0.000395000 |
| 1                           | 3.490817000  | -1.229563000 | -0.000451000 | 1                           | 3.606254000  | -1.238326000 | -0.000654000 |
| 6                           | 1.352582000  | -1.416847000 | 0.000134000  | 6                           | 1.465672000  | -1.395131000 | -0.000241000 |
| 1                           | 1.338555000  | 2.501910000  | 0.000309000  | 1                           | 1.438570000  | -2.479953000 | -0.000499000 |
| 6                           | -1.230550000 | 1.211077000  | -0.000090000 | 1                           | 1.438891000  | 2.479968000  | 0.000351000  |
| 6                           | -1.230597000 | -1.211064000 | 0.000031000  | 6                           | -1.020878000 | 1.459811000  | 0.000736000  |
| 6                           | -2.150680000 | -0.000004000 | -0.000495000 | 6                           | -1.021019000 | -1.459800000 | 0.000389000  |
| 1                           | 1.338569000  | -2.501911000 | 0.000217000  | 6                           | -2.268949000 | 0.670419000  | -0.000274000 |
| 8                           | -1.565384000 | -2.374235000 | 0.000208000  | 6                           | -2.269070000 | -0.670626000 | -0.000729000 |
| 1                           | -2.809785000 | 0.000085000  | 0.872314000  | 1                           | -3.189204000 | -1.247597000 | -0.001273000 |
| 1                           | -2.808682000 | -0.000019000 | -0.874143000 | 1                           | -3.188934000 | 1.247616000  | -0.000669000 |
| 8                           | -1.565396000 | 2.374229000  | 0.000181000  | 8                           | -1.054489000 | 2.680928000  | -0.000252000 |
|                             |              |              |              | 8                           | -1.054313000 | -2.680816000 | 0.000443000  |
| <b><math>r_{a27}</math></b> |              |              |              |                             |              |              |              |
| 6                           | 1.295036000  | 0.708950000  | -0.001402000 |                             |              |              |              |
| 6                           | 0.000070000  | 1.476774000  | 0.062535000  |                             |              |              |              |
| 6                           | -1.294945000 | 0.709151000  | -0.001402000 |                             |              |              |              |
| 7                           | -1.166846000 | -0.673321000 | 0.010676000  |                             |              |              |              |
| 6                           | -0.000111000 | -1.427371000 | 0.006581000  |                             |              |              |              |
| 7                           | 1.166796000  | -0.673428000 | 0.010651000  |                             |              |              |              |
| 1                           | 0.000153000  | 2.229192000  | -0.729784000 |                             |              |              |              |
| 1                           | 0.000141000  | 2.055002000  | 0.992281000  |                             |              |              |              |
| 1                           | -2.024448000 | -1.210707000 | -0.017854000 |                             |              |              |              |
| 1                           | 2.024274000  | -1.211048000 | -0.017889000 |                             |              |              |              |
| 8                           | 2.379125000  | 1.239214000  | -0.046455000 |                             |              |              |              |
| 8                           | -0.000113000 | -2.633630000 | -0.003816000 |                             |              |              |              |
| 8                           | -2.379021000 | 1.239388000  | -0.046468000 |                             |              |              |              |
| <b><math>r_{b1}</math></b>  |              |              |              | <b><math>r_{b2}</math></b>  |              |              |              |
| 6                           | 0.537768000  | 0.666320000  | 0.003907000  | 6                           | 0.990121000  | 1.374265000  | -0.000218000 |
| 6                           | 0.587593000  | -0.712145000 | 0.130384000  | 6                           | -0.246009000 | 0.738747000  | 0.000035000  |
| 7                           | -0.426170000 | 1.641830000  | 0.029975000  | 7                           | 2.112301000  | 0.652803000  | 0.000041000  |
| 6                           | -0.569476000 | -1.632950000 | 0.264295000  | 6                           | -0.202411000 | -0.668280000 | -0.000014000 |
| 6                           | -1.677772000 | 1.361613000  | 0.109374000  | 6                           | 2.000139000  | -0.683177000 | 0.000287000  |
| 6                           | -1.808072000 | -1.097107000 | -0.442443000 | 1                           | 2.935822000  | -1.237088000 | 0.000141000  |
| 1                           | -0.300671000 | -2.600219000 | -0.173096000 | 7                           | 0.886634000  | -1.422494000 | -0.000261000 |
| 1                           | -1.589539000 | -0.968489000 | -1.510663000 | 7                           | -1.551057000 | 1.193196000  | 0.000027000  |
| 7                           | -2.319952000 | 0.151608000  | 0.120273000  | 7                           | -1.517837000 | -1.058095000 | 0.000234000  |
| 6                           | 2.621723000  | -0.077206000 | -0.068866000 | 6                           | -2.263351000 | 0.099260000  | 0.000016000  |
| 7                           | 1.861887000  | 1.047210000  | -0.115648000 | 1                           | -1.857216000 | -2.007877000 | -0.000980000 |
| 7                           | 1.884268000  | -1.156401000 | 0.074789000  | 1                           | -3.344588000 | 0.063833000  | 0.000054000  |
| 1                           | 2.165039000  | 2.003875000  | -0.215069000 | 1                           | 1.084762000  | 2.458373000  | -0.000130000 |
| 1                           | 3.699013000  | -0.054027000 | -0.147106000 |                             |              |              |              |
| 1                           | -3.325396000 | 0.225957000  | 0.132784000  |                             |              |              |              |
| 1                           | -0.812406000 | -1.828869000 | 1.315554000  |                             |              |              |              |
| 1                           | -2.622755000 | -1.821251000 | -0.369322000 |                             |              |              |              |
| 1                           | -2.364099000 | 2.202150000  | 0.221289000  |                             |              |              |              |
| <b><math>r_{b3}</math></b>  |              |              |              | <b><math>r_{b4}</math></b>  |              |              |              |
| 7                           | -0.180053000 | -1.865639000 | -0.005361000 | 6                           | 0.198729000  | 1.472895000  | 0.002519000  |
| 6                           | 0.574894000  | -0.797971000 | -0.048670000 | 6                           | -0.853385000 | 0.499287000  | 0.006926000  |
| 6                           | -1.508093000 | -1.512036000 | 0.025197000  | 7                           | 1.467094000  | 0.790935000  | 0.000143000  |
| 1                           | -2.177880000 | -2.372495000 | 0.060824000  | 6                           | -0.519134000 | -0.851681000 | -0.000696000 |
| 6                           | 0.136639000  | 0.555217000  | -0.031968000 | 6                           | 1.669594000  | -0.560043000 | -0.001376000 |
| 7                           | -2.086185000 | -0.339958000 | 0.019996000  | 7                           | 2.970653000  | -0.993825000 | -0.075020000 |

|   |              |                                 |              |   |              |                                  |              |
|---|--------------|---------------------------------|--------------|---|--------------|----------------------------------|--------------|
| 6 | -1.308331000 | 0.817876000                     | -0.008829000 | 7 | 0.699216000  | -1.439718000                     | 0.007802000  |
| 7 | 1.953396000  | -0.785655000                    | -0.099696000 | 7 | -2.218422000 | 0.674891000                      | 0.007155000  |
| 6 | 1.261861000  | 1.330408000                     | 0.027290000  | 7 | -1.719145000 | -1.506440000                     | -0.003310000 |
| 7 | 2.359275000  | 0.529860000                     | 0.111235000  | 6 | -2.700564000 | -0.536641000                     | 0.000744000  |
| 1 | 2.502536000  | -1.503569000                    | 0.357588000  | 1 | -1.840112000 | -2.507687000                     | -0.010349000 |
| 8 | -1.776701000 | 1.944063000                     | -0.011566000 | 1 | -3.748975000 | -0.798124000                     | -0.000630000 |
| 1 | 3.244774000  | 0.787433000                     | -0.307170000 | 8 | 0.178536000  | 2.684374000                      | -0.004412000 |
| 1 | 1.377325000  | 2.404904000                     | 0.019956000  | 1 | 2.261367000  | 1.414787000                      | -0.064309000 |
|   |              |                                 |              | 1 | 3.668441000  | -0.427844000                     | 0.384379000  |
|   |              |                                 |              | 1 | 3.063784000  | -1.979924000                     | 0.120118000  |
|   |              | <b><math>\Gamma_{b5}</math></b> |              |   |              | <b><math>\Gamma_{b6}</math></b>  |              |
| 6 | 3.517755000  | -1.263691000                    | 0.302588000  | 7 | -0.798222000 | -1.693769000                     | 0.000104000  |
| 7 | 2.305937000  | -1.640414000                    | -0.112984000 | 6 | 0.494284000  | -1.246304000                     | 0.000058000  |
| 6 | 3.842488000  | 0.053385000                     | 0.584320000  | 6 | -1.874268000 | -0.821280000                     | 0.000012000  |
| 1 | 4.832376000  | 0.321754000                     | 0.934038000  | 6 | 0.759056000  | 0.104222000                      | 0.000073000  |
| 6 | 1.373928000  | -0.709330000                    | -0.291646000 | 7 | -1.547472000 | 0.544160000                      | 0.000131000  |
| 6 | 2.864380000  | 1.022307000                     | 0.391135000  | 6 | -2.692203000 | 1.446883000                      | -0.000022000 |
| 1 | 3.077626000  | 2.072059000                     | 0.572838000  | 6 | -0.247005000 | 1.117961000                      | 0.000037000  |
| 6 | 1.605509000  | 0.657987000                     | -0.072012000 | 7 | 1.620068000  | -1.993924000                     | -0.000022000 |
| 1 | 4.251205000  | -2.058291000                    | 0.4111792000 | 7 | 2.138863000  | 0.193104000                      | -0.000020000 |
| 7 | 0.155654000  | -1.186386000                    | -0.779998000 | 6 | 2.587234000  | -1.084194000                     | -0.000068000 |
| 7 | 0.674997000  | 1.650676000                     | -0.404734000 | 6 | 2.928716000  | 1.408497000                      | -0.000009000 |
| 6 | -1.106895000 | -0.826464000                    | -0.299134000 | 1 | 3.645001000  | -1.308329000                     | -0.000141000 |
| 6 | -0.696762000 | 1.722873000                     | -0.225644000 | 1 | -1.013720000 | -2.679527000                     | -0.000090000 |
| 1 | 0.240117000  | -2.183544000                    | -0.940359000 | 1 | 2.705451000  | 2.008030000                      | -0.883039000 |
| 1 | 1.060169000  | 2.582001000                     | -0.504062000 | 1 | 2.706824000  | 2.007180000                      | 0.883971000  |
| 8 | -1.224663000 | 2.821400000                     | -0.288143000 | 1 | 3.983290000  | 1.135215000                      | -0.000910000 |
| 6 | -2.051050000 | -1.855930000                    | -0.173096000 | 8 | -3.023946000 | -1.210053000                     | -0.000124000 |
| 6 | -1.496426000 | 0.492273000                     | 0.004509000  | 8 | -0.067224000 | 2.325741000                      | -0.000058000 |
| 6 | -3.336551000 | -1.604856000                    | 0.269886000  | 1 | -3.308410000 | 1.273310000                      | -0.883034000 |
| 6 | -2.803341000 | 0.716771000                     | 0.459399000  | 1 | -3.308532000 | 1.273449000                      | 0.882932000  |
| 1 | -4.039442000 | -2.427038000                    | 0.359745000  | 1 | -2.308094000 | 2.463453000                      | -0.000059000 |
| 1 | -3.076873000 | 1.744325000                     | 0.670348000  |   |              |                                  |              |
| 6 | -3.718503000 | -0.308400000                    | 0.607198000  |   |              |                                  |              |
| 1 | -4.720521000 | -0.102103000                    | 0.965721000  |   |              |                                  |              |
| 1 | -1.750653000 | -2.869053000                    | -0.425920000 |   |              |                                  |              |
|   |              | <b><math>\Gamma_{b7}</math></b> |              |   |              | <b><math>\Gamma_{b8}</math></b>  |              |
| 6 | -0.633007000 | 1.688686000                     | -0.296365000 | 6 | -1.375676000 | 0.958608000                      | -0.000006000 |
| 6 | 0.546626000  | 0.789027000                     | -0.107144000 | 6 | 0.035577000  | 0.514461000                      | 0.000013000  |
| 6 | -1.872829000 | 1.101785000                     | 0.369830000  | 6 | -2.336827000 | -0.128892000                     | 0.000010000  |
| 1 | -2.779766000 | 1.651846000                     | 0.117479000  | 1 | -3.391421000 | 0.114301000                      | 0.000001000  |
| 6 | 0.337774000  | -0.597570000                    | -0.078630000 | 6 | 0.379829000  | -0.849268000                     | 0.000011000  |
| 6 | -2.110430000 | -0.354371000                    | 0.037805000  | 6 | -1.941716000 | -1.426395000                     | 0.000005000  |
| 8 | -3.201725000 | -0.876515000                    | -0.006203000 | 1 | -2.646156000 | -2.250598000                     | 0.000006000  |
| 7 | -0.951694000 | -1.093976000                    | -0.164991000 | 7 | -0.627038000 | -1.788244000                     | 0.000005000  |
| 1 | -1.053402000 | -2.099507000                    | -0.235989000 | 1 | -0.345013000 | -2.757715000                     | -0.000034000 |
| 1 | -0.821746000 | 1.808237000                     | -1.372198000 | 8 | -1.681324000 | 2.148970000                      | -0.000082000 |
| 6 | 1.867431000  | 1.181151000                     | 0.007163000  | 6 | 1.092249000  | 1.426432000                      | 0.000023000  |
| 7 | 1.326030000  | -1.485366000                    | 0.009577000  | 7 | 1.630416000  | -1.325089000                     | 0.000003000  |
| 7 | 2.889860000  | 0.320657000                     | 0.110257000  | 6 | 2.393277000  | 0.960156000                      | 0.000024000  |
| 6 | 2.552015000  | -0.965295000                    | 0.091189000  | 6 | 2.604223000  | -0.422481000                     | 0.000020000  |
| 1 | 3.367766000  | -1.682627000                    | 0.155187000  | 1 | 0.848311000  | 2.484519000                      | 0.000022000  |
| 1 | 2.123259000  | 2.240716000                     | 0.009815000  | 1 | 3.239209000  | 1.637881000                      | 0.000021000  |
| 1 | -0.425115000 | 2.691574000                     | 0.086433000  | 1 | 3.616401000  | -0.822537000                     | -0.000017000 |
| 1 | -1.772050000 | 1.152196000                     | 1.461912000  |   |              |                                  |              |
|   |              | <b><math>\Gamma_{b9}</math></b> |              |   |              | <b><math>\Gamma_{b10}</math></b> |              |
| 6 | 0.990121000  | 1.374265000                     | -0.000218000 | 6 | 0.275388000  | 1.439617000                      | 0.000446000  |
| 6 | -0.246009000 | 0.738747000                     | 0.000035000  | 6 | -0.768546000 | 0.461045000                      | -0.000134000 |
| 7 | 2.112301000  | 0.652803000                     | 0.000041000  | 7 | 1.528333000  | 0.790784000                      | -0.000003000 |
| 6 | -0.202411000 | -0.668280000                    | -0.000014000 | 1 | 2.337271000  | 1.398329000                      | 0.000042000  |
| 6 | 2.000139000  | -0.683177000                    | 0.000287000  | 6 | -0.544856000 | -0.897226000                     | -0.000057000 |
| 1 | 2.935822000  | -1.237088000                    | 0.000141000  | 6 | 1.840567000  | -0.571390000                     | -0.000021000 |
| 7 | 0.886634000  | -1.422494000                    | -0.000261000 | 8 | 2.978821000  | -0.983832000                     | -0.000036000 |
| 7 | -1.551057000 | 1.193196000                     | 0.000027000  | 7 | 0.729581000  | -1.401833000                     | -0.000053000 |
| 7 | -1.517837000 | -1.058095000                    | 0.000234000  | 8 | 0.172285000  | 2.652242000                      | -0.000023000 |
| 6 | -2.263351000 | 0.099260000                     | 0.000016000  | 7 | -2.140480000 | 0.582245000                      | -0.000320000 |
| 1 | -1.857216000 | -2.007877000                    | -0.000980000 | 7 | -1.698373000 | -1.608236000                     | 0.000025000  |

|   |              |                             |              |    |              |                             |              |
|---|--------------|-----------------------------|--------------|----|--------------|-----------------------------|--------------|
| 1 | -3.344588000 | 0.063833000                 | 0.000054000  | 6  | -2.639839000 | -0.676549000                | 0.000315000  |
| 1 | 1.084762000  | 2.458373000                 | -0.000130000 | 1  | -3.701593000 | -0.874379000                | 0.000483000  |
|   |              |                             |              | 1  | -2.652420000 | 1.451746000                 | -0.000807000 |
|   |              |                             |              | 1  | 0.898185000  | -2.396685000                | -0.000096000 |
|   |              | <b><math>r_{b11}</math></b> |              |    |              | <b><math>r_{b12}</math></b> |              |
| 7 | 0.142164000  | -1.880209000                | 0.000088000  | 6  | 1.143899000  | 0.113737000                 | 0.000112000  |
| 6 | -0.628958000 | -0.765098000                | -0.000146000 | 6  | -0.182778000 | -0.400217000                | 0.000005000  |
| 6 | 1.409703000  | -1.587400000                | -0.000350000 | 7  | 1.201360000  | 1.508753000                 | 0.000039000  |
| 1 | 2.141978000  | -2.390715000                | 0.000610000  | 6  | -1.320013000 | 0.383898000                 | 0.000039000  |
| 6 | -0.242981000 | 0.572666000                 | 0.000140000  | 6  | 0.120314000  | 2.219439000                 | 0.000036000  |
| 7 | 1.912279000  | -0.324098000                | 0.000023000  | 1  | 0.200306000  | 3.304370000                 | 0.000049000  |
| 1 | 2.916165000  | -0.192834000                | -0.000069000 | 7  | -1.164611000 | 1.743682000                 | 0.000056000  |
| 6 | 1.158504000  | 0.899229000                 | 0.000447000  | 7  | -0.673182000 | -1.681132000                | -0.000032000 |
| 7 | -1.996160000 | -0.734896000                | 0.000283000  | 7  | -2.465046000 | -0.337335000                | 0.000080000  |
| 7 | -1.335439000 | 1.403220000                 | 0.000386000  | 6  | -2.028244000 | -1.588087000                | -0.000040000 |
| 6 | -2.359717000 | 0.590883000                 | -0.000537000 | 1  | -2.665346000 | -2.459810000                | -0.000070000 |
| 1 | -2.600864000 | -1.542487000                | -0.000424000 | 16 | 2.489315000  | -0.856806000                | -0.000120000 |
| 8 | 1.732677000  | 1.965647000                 | -0.000317000 | 1  | -0.088485000 | -2.506926000                | -0.000061000 |
| 1 | -3.397905000 | 0.891050000                 | -0.000371000 | 1  | -1.964230000 | 2.360863000                 | 0.000097000  |
|   |              | <b><math>r_{c1}</math></b>  |              |    |              | <b><math>r_{c2}</math></b>  |              |
| 7 | -0.180053000 | -1.865639000                | -0.005361000 | 7  | 1.530878000  | 1.364099000                 | -0.070804000 |
| 6 | 0.574894000  | -0.797971000                | -0.048670000 | 6  | 0.233824000  | 0.871377000                 | 0.010775000  |
| 6 | -1.508093000 | -1.512036000                | 0.025197000  | 6  | 2.582419000  | 0.386917000                 | 0.233685000  |
| 1 | -2.177880000 | -2.372495000                | 0.060824000  | 6  | -0.061057000 | -0.458315000                | 0.088143000  |
| 6 | 0.136639000  | 0.555217000                 | -0.031968000 | 6  | 2.223429000  | -0.964492000                | -0.364834000 |
| 7 | -2.086185000 | -0.339958000                | 0.019996000  | 7  | 0.958018000  | -1.398444000                | 0.192885000  |
| 6 | -1.308331000 | 0.817876000                 | -0.008829000 | 1  | 0.622639000  | -2.315245000                | -0.085017000 |
| 7 | 1.953396000  | -0.785655000                | -0.099696000 | 7  | -0.815372000 | 1.763062000                 | -0.051672000 |
| 6 | 1.261861000  | 1.330408000                 | 0.027290000  | 6  | -1.435748000 | -0.921019000                | 0.038844000  |
| 7 | 2.359275000  | 0.529860000                 | 0.111235000  | 6  | -2.101270000 | 1.296969000                 | -0.058284000 |
| 1 | 2.502536000  | -1.503569000                | 0.357588000  | 7  | -2.440722000 | 0.056863000                 | -0.004022000 |
| 8 | -1.776701000 | 1.944063000                 | -0.011566000 | 1  | -0.632955000 | 2.742978000                 | -0.211477000 |
| 1 | 3.244774000  | 0.787433000                 | -0.307170000 | 1  | -2.861477000 | 2.075163000                 | -0.108568000 |
| 1 | 1.377325000  | 2.404904000                 | 0.019956000  | 8  | -1.688766000 | -2.122057000                | 0.035626000  |
|   |              | <b><math>r_{c3}</math></b>  |              | 1  | 1.665074000  | 2.242357000                 | 0.415967000  |
|   |              |                             |              | 1  | 2.192170000  | -0.874719000                | -1.462667000 |
|   |              |                             |              | 1  | 3.520926000  | 0.751907000                 | -0.191793000 |
|   |              |                             |              | 1  | 3.003711000  | -1.686554000                | -0.112754000 |
|   |              |                             |              | 1  | 2.720855000  | 0.272881000                 | 1.316613000  |
|   |              | <b><math>r_{c4}</math></b>  |              |    |              | <b><math>r_{c5}</math></b>  |              |
| 6 | 1.213663000  | 0.897133000                 | 0.000392000  | 6  | 1.070900000  | 1.419396000                 | 0.000006000  |
| 6 | -0.203503000 | 0.573900000                 | 0.000134000  | 6  | 0.027971000  | 0.488817000                 | 0.000004000  |
| 7 | 2.085404000  | -0.230927000                | 0.000087000  | 6  | 2.388989000  | 1.000629000                 | 0.000014000  |
| 6 | -0.612394000 | -0.747476000                | -0.000188000 | 1  | 3.194815000  | 1.726704000                 | 0.000010000  |
| 6 | 1.619859000  | -1.425077000                | -0.000211000 | 6  | 0.345127000  | -0.877587000                | -0.000002000 |
| 7 | 0.286669000  | -1.778802000                | -0.000313000 | 6  | 2.686662000  | -0.366598000                | 0.000007000  |
| 6 | -1.390179000 | 1.362884000                 | 0.000033000  | 1  | 3.720400000  | -0.696235000                | 0.000007000  |
| 7 | -1.968928000 | -0.801867000                | -0.000176000 | 6  | 1.674297000  | -1.309181000                | 0.000001000  |
| 6 | -2.452257000 | 0.505026000                 | -0.000084000 | 1  | 1.900866000  | -2.371475000                | 0.000001000  |
| 1 | -2.539091000 | -1.631214000                | -0.000289000 | 1  | 0.803607000  | 2.470500000                 | -0.000047000 |
| 1 | -1.433870000 | 2.440511000                 | 0.000143000  | 6  | -1.386620000 | 0.927247000                 | -0.000002000 |
| 8 | 1.663537000  | 2.027337000                 | 0.000447000  | 7  | -0.715979000 | -1.768206000                | -0.000008000 |
| 1 | 0.009841000  | -2.748415000                | -0.000605000 | 7  | -2.371443000 | -0.078937000                | -0.000006000 |
| 1 | 2.297139000  | -2.279488000                | -0.000352000 | 6  | -2.000124000 | -1.310860000                | -0.000007000 |
| 1 | -3.515464000 | 0.682741000                 | -0.000115000 | 8  | -1.694906000 | 2.103734000                 | 0.000005000  |
|   |              | <b><math>r_{c5}</math></b>  |              | 1  | -2.754281000 | -2.099091000                | -0.000016000 |
|   |              |                             |              | 1  | -0.537418000 | -2.761445000                | -0.000013000 |
|   |              |                             |              |    |              | <b><math>r_{c6}</math></b>  |              |
| 7 | 0.357677000  | -1.804628000                | 0.000064000  | 6  | 1.064273000  | 1.171435000                 | 0.000000000  |
| 6 | -0.626549000 | -0.841482000                | -0.000038000 | 7  | 1.134793000  | -0.175107000                | 0.000000000  |
| 6 | 1.657967000  | -1.381427000                | 0.000095000  | 6  | -0.160952000 | 1.767202000                 | 0.000000000  |
| 1 | 2.387731000  | -2.190950000                | 0.000080000  | 1  | 2.029918000  | -0.646678000                | 0.000000000  |
| 6 | -0.228641000 | 0.485772000                 | -0.000121000 | 1  | -0.270192000 | 2.842047000                 | 0.000000000  |
| 7 | 2.071854000  | -0.158971000                | -0.000025000 | 6  | 0.000000000  | -1.040197000                | 0.000000000  |
| 6 | 1.158073000  | 0.912697000                 | -0.000215000 | 6  | -1.278386000 | 0.894591000                 | 0.000000000  |
| 1 | 0.139122000  | -2.789118000                | 0.000075000  | 8  | 0.179352000  | -2.237120000                | 0.000000000  |



|   |              |                        |              |   |              |                        |              |
|---|--------------|------------------------|--------------|---|--------------|------------------------|--------------|
| 6 | -1.207341000 | 0.872146000            | -0.002712000 | 7 | 1.219690000  | 0.382525000            | 0.000000000  |
| 6 | 2.024369000  | -0.722175000           | -0.010245000 | 7 | -1.125717000 | 0.150630000            | 0.000000000  |
| 6 | 1.391050000  | 1.327569000            | 0.014275000  | 1 | -2.039708000 | 0.587810000            | 0.000000000  |
| 7 | 2.480699000  | 0.516752000            | 0.011481000  | 6 | 0.000000000  | 1.032233000            | 0.000000000  |
| 8 | -1.651419000 | 1.998893000            | -0.015501000 | 8 | -0.177431000 | 2.224386000            | 0.000000000  |
| 1 | 1.474812000  | 2.403570000            | 0.023662000  |   |              |                        |              |
| 1 | 2.611103000  | -1.628984000           | -0.022905000 |   |              |                        |              |
| 1 | 0.109552000  | -2.656583000           | 0.253050000  |   |              |                        |              |
| 1 | -2.198279000 | -2.314325000           | 0.060653000  |   |              |                        |              |
|   |              | <b>r<sub>c15</sub></b> |              |   |              | <b>r<sub>c16</sub></b> |              |
| 6 | 0.275388000  | 1.439617000            | 0.000446000  | 6 | 1.116497000  | 0.859364000            | 0.000306000  |
| 6 | -0.768546000 | 0.461045000            | -0.000134000 | 7 | -0.237846000 | 0.504490000            | 0.000055000  |
| 7 | 1.528333000  | 0.790784000            | -0.000003000 | 7 | 1.881003000  | -0.291509000           | 0.000180000  |
| 1 | 2.337271000  | 1.398329000            | 0.000042000  | 6 | -0.647356000 | -0.837315000           | -0.000304000 |
| 6 | -0.544856000 | -0.897226000           | -0.000057000 | 7 | 1.482014000  | -1.625162000           | -0.000122000 |
| 6 | 1.840567000  | -0.571390000           | -0.000021000 | 7 | 0.240466000  | -1.867608000           | -0.000570000 |
| 8 | 2.978821000  | -0.983832000           | -0.000036000 | 6 | -1.371213000 | 1.261080000            | -0.000173000 |
| 7 | 0.729581000  | -1.401833000           | -0.000053000 | 6 | -2.024580000 | -0.785620000           | 0.000028000  |
| 8 | 0.172285000  | 2.652242000            | -0.000023000 | 7 | -2.451194000 | 0.507000000            | 0.000033000  |
| 7 | -2.140480000 | 0.582245000            | -0.000320000 | 1 | -2.710109000 | -1.619441000           | 0.000094000  |
| 7 | -1.698373000 | -1.608236000           | 0.000025000  | 1 | -1.335977000 | 2.340162000            | -0.000145000 |
| 6 | -2.639839000 | -0.676549000           | 0.000315000  | 8 | 1.539968000  | 1.985463000            | 0.000443000  |
| 1 | -3.701593000 | -0.874379000           | 0.000483000  | 1 | 2.885152000  | -0.179960000           | 0.000339000  |
| 1 | -2.652420000 | 1.451746000            | -0.000807000 |   |              |                        |              |
| 1 | 0.898185000  | -2.396685000           | -0.000096000 |   |              |                        |              |
|   |              | <b>r<sub>c17</sub></b> |              |   |              | <b>r<sub>c18</sub></b> |              |
| 6 | -1.072550000 | 0.031263000            | 0.002609000  | 6 | 1.341601000  | 0.906899000            | 0.000006000  |
| 7 | -0.343162000 | -1.139155000           | -0.111527000 | 6 | -0.057788000 | 0.480056000            | 0.000107000  |
| 6 | -0.224909000 | 1.247734000            | 0.275939000  | 7 | 2.237003000  | -0.161637000           | 0.000012000  |
| 1 | -0.742285000 | 2.124891000            | -0.114031000 | 1 | 3.220628000  | 0.076331000            | -0.000105000 |
| 7 | 1.002852000  | -1.308248000           | 0.136583000  | 6 | -0.361405000 | -0.897101000           | 0.000055000  |
| 6 | 1.183691000  | 1.097546000            | -0.280129000 | 7 | 1.980626000  | -1.486006000           | -0.000033000 |
| 1 | 1.844196000  | 1.889645000            | 0.080681000  | 6 | 0.729220000  | -1.828973000           | -0.000003000 |
| 6 | 1.723861000  | -0.252456000           | 0.060349000  | 1 | 0.541134000  | -2.898830000           | -0.000133000 |
| 1 | 2.785346000  | -0.403747000           | 0.238307000  | 8 | 1.744264000  | 2.058228000            | -0.000054000 |
| 8 | -2.283782000 | 0.027727000            | -0.077214000 | 6 | -1.083757000 | 1.428332000            | 0.000055000  |
| 1 | -0.870383000 | -2.001528000           | -0.106154000 | 6 | -1.706945000 | -1.300412000           | 0.000019000  |
| 1 | -0.193605000 | 1.363299000            | 1.366856000  | 6 | -2.402695000 | 1.013561000            | -0.000035000 |
| 1 | 1.168604000  | 1.192921000            | -1.375943000 | 6 | -2.712674000 | -0.353285000           | -0.000055000 |
|   |              | <b>r<sub>d1</sub></b>  |              | 1 | -3.203390000 | 1.745886000            | -0.000152000 |
| 6 | 0.000000000  | 0.000000000            | 0.926028000  | 1 | -3.750824000 | -0.669125000           | -0.000140000 |
| 6 | 0.000000000  | -1.213653000           | 0.259712000  | 1 | -1.944838000 | -2.359981000           | 0.000102000  |
| 6 | 0.000000000  | 1.213653000            | 0.259712000  | 1 | -0.813569000 | 2.478934000            | 0.000116000  |
| 1 | 0.000000000  | -2.136920000           | 0.827133000  |   |              |                        |              |
| 1 | 0.000000000  | 2.136920000            | 0.827133000  |   |              |                        |              |
| 6 | 0.000000000  | -1.203779000           | -1.131052000 |   |              |                        |              |
| 6 | 0.000000000  | 1.203779000            | -1.131052000 |   |              |                        |              |
| 1 | 0.000000000  | -2.145710000           | -1.669960000 |   |              |                        |              |
| 1 | 0.000000000  | 2.145710000            | -1.669960000 |   |              |                        |              |
| 6 | 0.000000000  | 0.000000000            | -1.828730000 |   |              |                        |              |
| 1 | 0.000000000  | 0.000000000            | -2.913189000 |   |              |                        |              |
| 9 | 0.000000000  | 0.000000000            | 2.274570000  |   |              |                        |              |
|   |              | <b>r<sub>d3</sub></b>  |              |   |              | <b>r<sub>d2</sub></b>  |              |
| 6 | 0.618935000  | -1.793318000           | -0.058702000 | 6 | -0.789471000 | 0.946847000            | 0.130010000  |
| 6 | 1.605378000  | -0.828305000           | -0.000377000 | 6 | 0.565233000  | 1.209109000            | 0.057208000  |
| 6 | -0.719283000 | -1.413920000           | -0.101370000 | 6 | -1.248342000 | -0.370479000           | 0.130119000  |
|   |              |                        |              | 6 | 1.514471000  | 0.191611000            | -0.015474000 |
|   |              |                        |              | 6 | -0.323406000 | -1.412078000           | 0.052797000  |
|   |              |                        |              | 1 | -0.635258000 | -2.450895000           | 0.040912000  |
|   |              |                        |              | 6 | 1.020901000  | -1.108148000           | -0.009783000 |
|   |              |                        |              | 9 | 1.951712000  | -2.093980000           | -0.085827000 |
|   |              |                        |              | 1 | -1.494633000 | 1.767824000            | 0.183562000  |
|   |              |                        |              | 8 | 2.833665000  | 0.480074000            | -0.094926000 |
|   |              |                        |              | 1 | 3.314720000  | -0.354314000           | -0.142483000 |
|   |              |                        |              | 9 | 1.004318000  | 2.477074000            | 0.052220000  |
|   |              |                        |              | 6 | -2.720609000 | -0.668999000           | 0.248396000  |
|   |              |                        |              | 7 | -3.533054000 | 0.399070000            | -0.320600000 |
|   |              |                        |              | 1 | -4.514930000 | 0.227396000            | -0.136037000 |
|   |              |                        |              | 1 | -3.428175000 | 0.415199000            | -1.330770000 |
|   |              |                        |              | 1 | -2.910970000 | -1.667010000           | -0.179829000 |
|   |              |                        |              | 1 | -2.985638000 | -0.747310000           | 1.311082000  |
|   |              |                        |              |   |              |                        |              |
|   |              |                        |              |   |              | <b>r<sub>d4</sub></b>  |              |
|   |              |                        |              | 6 | 0.000000000  | 0.889749000            | 0.000000000  |
|   |              |                        |              | 7 | 1.189140000  | 0.340878000            | 0.000000000  |
|   |              |                        |              | 6 | -1.213882000 | 0.214763000            | 0.000000000  |

|                        |              |              |              |                        |              |              |              |
|------------------------|--------------|--------------|--------------|------------------------|--------------|--------------|--------------|
| 6                      | 1.291362000  | 0.529317000  | 0.016319000  | 1                      | -2.149067000 | 0.760932000  | 0.000000000  |
| 6                      | -1.088347000 | -0.068959000 | -0.084300000 | 6                      | 1.226006000  | -0.996569000 | 0.000000000  |
| 6                      | -0.058256000 | 0.857520000  | -0.026309000 | 6                      | -1.152819000 | -1.170039000 | 0.000000000  |
| 9                      | -0.337940000 | 2.191971000  | -0.010950000 | 1                      | 2.218890000  | -1.441413000 | 0.000000000  |
| 1                      | 0.911447000  | -2.836462000 | -0.070688000 | 1                      | -2.067427000 | -1.753880000 | 0.000000000  |
| 8                      | 2.270847000  | 1.459619000  | 0.074982000  | 6                      | 0.091528000  | -1.795337000 | 0.000000000  |
| 1                      | 1.852718000  | 2.328688000  | 0.072092000  | 1                      | 0.180212000  | -2.875164000 | 0.000000000  |
| 9                      | 2.899587000  | -1.180714000 | 0.044277000  | 9                      | -0.023510000 | 2.229775000  | 0.000000000  |
| 6                      | -2.519533000 | 0.393323000  | -0.133729000 |                        |              |              |              |
| 7                      | -3.445644000 | -0.694818000 | 0.152015000  |                        |              |              |              |
| 1                      | -4.397707000 | -0.377360000 | 0.008869000  |                        |              |              |              |
| 1                      | -3.378740000 | -0.954823000 | 1.132027000  |                        |              |              |              |
| 1                      | -2.629056000 | 1.268228000  | 0.526328000  |                        |              |              |              |
| 1                      | -2.739872000 | 0.763662000  | -1.143214000 |                        |              |              |              |
| 1                      | -1.502409000 | -2.160426000 | -0.158516000 |                        |              |              |              |
| <b>r<sub>d5</sub></b>  |              |              |              | <b>r<sub>d6</sub></b>  |              |              |              |
| 6                      | 0.000000000  | 0.000000000  | 1.363766000  | 6                      | 1.080483000  | 1.210886000  | 0.000000000  |
| 6                      | 0.000000000  | 1.212555000  | 0.694991000  | 6                      | -0.304365000 | 1.180521000  | 0.000000000  |
| 6                      | 0.000000000  | -1.212555000 | 0.694991000  | 6                      | 1.763603000  | 0.000000000  | 0.000000000  |
| 1                      | 0.000000000  | 2.137735000  | 1.258738000  | 9                      | -0.980893000 | 2.342685000  | 0.000000000  |
| 1                      | 0.000000000  | -2.137735000 | 1.258738000  | 1                      | 2.848130000  | 0.000000000  | 0.000000000  |
| 6                      | 0.000000000  | 1.212598000  | -0.695031000 | 6                      | -1.028749000 | 0.000000000  | 0.000000000  |
| 6                      | 0.000000000  | -1.212598000 | -0.695031000 | 6                      | 1.080483000  | -1.210886000 | 0.000000000  |
| 1                      | 0.000000000  | 2.137695000  | -1.258871000 | 1                      | -2.110692000 | 0.000000000  | 0.000000000  |
| 1                      | 0.000000000  | -2.137695000 | -1.258871000 | 1                      | 1.598056000  | -2.162035000 | 0.000000000  |
| 6                      | 0.000000000  | 0.000000000  | -1.363681000 | 6                      | -0.304365000 | -1.180521000 | 0.000000000  |
| 9                      | 0.000000000  | 0.000000000  | -2.711555000 | 9                      | -0.980894000 | -2.342685000 | 0.000000000  |
| 9                      | 0.000000000  | 0.000000000  | 2.711581000  | 1                      | 1.598055000  | 2.162035000  | 0.000000000  |
| <b>r<sub>d7</sub></b>  |              |              |              | <b>r<sub>d8</sub></b>  |              |              |              |
| 6                      | 1.052712000  | -1.684335000 | 0.000000000  | 6                      | 1.189739000  | 1.008665000  | 0.000000000  |
| 6                      | -0.327940000 | -1.508840000 | 0.000000000  | 6                      | 0.011130000  | 1.733870000  | 0.000000000  |
| 6                      | 1.899265000  | -0.581411000 | 0.000000000  | 6                      | 1.212156000  | -0.377032000 | 0.000000000  |
| 1                      | -1.012444000 | -2.348983000 | 0.000000000  | 1                      | 0.041402000  | 2.815950000  | 0.000000000  |
| 1                      | 2.974644000  | -0.717897000 | 0.000000000  | 1                      | 2.144198000  | -0.926908000 | 0.000000000  |
| 6                      | -0.846309000 | -0.226490000 | 0.000000000  | 6                      | -1.195582000 | 1.042274000  | 0.000000000  |
| 6                      | 1.372739000  | 0.706766000  | 0.000000000  | 6                      | 0.000000000  | -1.043230000 | 0.000000000  |
| 9                      | -2.171224000 | -0.029479000 | 0.000000000  | 1                      | -2.143296000 | 1.567417000  | 0.000000000  |
| 1                      | 2.007202000  | 1.585259000  | 0.000000000  | 9                      | -0.025950000 | -2.379039000 | 0.000000000  |
| 6                      | 0.000000000  | 0.875951000  | 0.000000000  | 6                      | -1.199357000 | -0.340368000 | 0.000000000  |
| 9                      | -0.532664000 | 2.104986000  | 0.000000000  | 9                      | -2.354175000 | -1.019104000 | 0.000000000  |
| 1                      | 1.462783000  | -2.687785000 | 0.000000000  | 9                      | 2.363368000  | 1.664640000  | 0.000000000  |
| <b>r<sub>d9</sub></b>  |              |              |              | <b>r<sub>d10</sub></b> |              |              |              |
| 6                      | -0.000064000 | -1.408082000 | 0.000000000  | 6                      | 1.209208000  | -1.369794000 | 0.000000000  |
| 6                      | 1.179257000  | -0.681401000 | 0.000000000  | 6                      | -0.000020000 | -2.055187000 | 0.000000000  |
| 6                      | -1.179471000 | -0.681449000 | 0.000000000  | 6                      | 1.195941000  | 0.014068000  | 0.000000000  |
| 9                      | 2.341860000  | -1.350810000 | 0.000000000  | 1                      | -0.000078000 | -3.138824000 | 0.000000000  |
| 9                      | -2.341696000 | -1.350558000 | 0.000000000  | 9                      | 2.340318000  | 0.706255000  | 0.000000000  |
| 6                      | 1.218271000  | 0.703221000  | 0.000000000  | 6                      | -1.209234000 | -1.369739000 | 0.000000000  |
| 6                      | -1.218261000 | 0.703231000  | 0.000000000  | 6                      | 0.000000000  | 0.720896000  | 0.000000000  |
| 1                      | 2.154740000  | 1.243780000  | 0.000000000  | 1                      | -2.161848000 | -1.885179000 | 0.000000000  |
| 1                      | -2.154692000 | 1.243862000  | 0.000000000  | 9                      | 0.000035000  | 2.052245000  | 0.000000000  |
| 6                      | 0.000000000  | 1.361883000  | 0.000000000  | 6                      | -1.195984000 | 0.014143000  | 0.000000000  |
| 9                      | 0.000011000  | 2.703281000  | 0.000000000  | 9                      | -2.340284000 | 0.706259000  | 0.000000000  |
| 1                      | -0.000015000 | -2.489278000 | 0.000000000  | 1                      | 2.161843000  | -1.885156000 | 0.000000000  |
| <b>r<sub>d11</sub></b> |              |              |              | <b>r<sub>d12</sub></b> |              |              |              |
| 9                      | -2.442534000 | -0.803836000 | -0.000166000 | 6                      | 0.000000000  | 1.378605000  | -0.525288000 |
| 8                      | -1.517969000 | 1.829044000  | 0.000103000  | 6                      | 0.000000000  | 0.694542000  | 0.684814000  |
| 8                      | 2.816319000  | 0.326762000  | -0.000076000 | 6                      | 0.000000000  | 0.695203000  | -1.726531000 |
| 7                      | 0.634288000  | 1.045467000  | 0.000278000  | 9                      | 0.000000000  | 1.355394000  | 1.838346000  |
| 1                      | 1.120218000  | -1.208598000 | -0.000018000 | 1                      | 0.000000000  | 1.258018000  | -2.651379000 |
| 6                      | -0.763681000 | 0.882379000  | 0.000104000  | 6                      | 0.000000000  | -0.694542000 | 0.684814000  |
| 6                      | 1.631934000  | 0.082363000  | 0.000054000  | 6                      | 0.000000000  | -0.695203000 | -1.726531000 |
| 6                      | -1.139725000 | -0.522514000 | -0.000045000 | 9                      | 0.000000000  | -1.355394000 | 1.838346000  |
| 6                      | -0.221353000 | -1.504819000 | -0.000146000 | 1                      | 0.000000000  | -1.258018000 | -2.651379000 |



|                        |              |              |              |                        |              |              |              |
|------------------------|--------------|--------------|--------------|------------------------|--------------|--------------|--------------|
| 1                      | 0.962113000  | 2.003413000  | 0.000257000  | 6                      | 0.000000000  | -1.378605000 | -0.525288000 |
| 1                      | 1.807025000  | -1.946905000 | -0.000294000 | 9                      | 0.000000000  | -2.715385000 | -0.499078000 |
| 1                      | -0.497719000 | -2.550967000 | -0.000304000 | 9                      | 0.000000000  | 2.715385000  | -0.499078000 |
| <b>r<sub>d13</sub></b> |              |              |              | <b>r<sub>d14</sub></b> |              |              |              |
| 6                      | 0.000000000  | 1.379124000  | 0.000000000  | 6                      | 1.216583000  | -1.002477000 | 0.000000000  |
| 6                      | 1.207706000  | 0.703506000  | 0.000000000  | 6                      | 1.194344000  | 0.381770000  | 0.000000000  |
| 6                      | -1.200434000 | 0.680471000  | 0.000000000  | 6                      | 0.000000000  | -1.663261000 | 0.000000000  |
| 1                      | 2.142306000  | 1.249238000  | 0.000000000  | 9                      | 2.339132000  | 1.067001000  | 0.000000000  |
| 9                      | -2.353741000 | 1.356306000  | 0.000000000  | 9                      | 0.000000000  | -3.004791000 | 0.000000000  |
| 6                      | 1.200183000  | -0.680594000 | 0.000000000  | 6                      | 0.000000000  | 1.090921000  | 0.000000000  |
| 6                      | -1.207815000 | -0.703509000 | 0.000000000  | 6                      | -1.216583000 | -1.002477000 | 0.000000000  |
| 9                      | 2.353793000  | -1.356123000 | 0.000000000  | 9                      | 0.000000000  | 2.422393000  | 0.000000000  |
| 1                      | -2.142324000 | -1.249312000 | 0.000000000  | 1                      | -2.154580000 | -1.540948000 | 0.000000000  |
| 6                      | 0.000150000  | -1.379404000 | 0.000000000  | 6                      | -1.194344000 | 0.381770000  | 0.000000000  |
| 9                      | 0.018531000  | -2.715355000 | 0.000000000  | 9                      | -2.339132000 | 1.067000000  | 0.000000000  |
| 9                      | -0.018441000 | 2.715452000  | 0.000000000  | 1                      | 2.154581000  | -1.540948000 | 0.000000000  |
| <b>r<sub>e1</sub></b>  |              |              |              | <b>r<sub>e2</sub></b>  |              |              |              |
| 7                      | -0.180053000 | -1.865639000 | -0.005361000 | 7                      | 1.530878000  | 1.364099000  | -0.070804000 |
| 6                      | 0.574894000  | -0.797971000 | -0.048670000 | 6                      | 0.233824000  | 0.871377000  | 0.010775000  |
| 6                      | -1.508093000 | -1.512036000 | 0.025197000  | 6                      | 2.582419000  | 0.386917000  | 0.233685000  |
| 1                      | -2.177880000 | -2.372495000 | 0.060824000  | 6                      | -0.061057000 | -0.458315000 | 0.088143000  |
| 6                      | 0.136639000  | 0.555217000  | -0.031968000 | 6                      | 2.223429000  | -0.964492000 | -0.364834000 |
| 7                      | -2.086185000 | -0.339958000 | 0.019996000  | 7                      | 0.958018000  | -1.398444000 | 0.192885000  |
| 6                      | -1.308331000 | 0.817876000  | -0.008829000 | 1                      | 0.622639000  | -2.315245000 | -0.085017000 |
| 7                      | 1.953396000  | -0.785655000 | -0.099696000 | 7                      | -0.815372000 | 1.763062000  | -0.051672000 |
| 6                      | 1.261861000  | 1.330408000  | 0.027290000  | 6                      | -1.435748000 | -0.921019000 | 0.038844000  |
| 7                      | 2.359275000  | 0.529860000  | 0.111235000  | 6                      | -2.101270000 | 1.296969000  | -0.058284000 |
| 1                      | 2.502536000  | -1.503569000 | 0.357588000  | 7                      | -2.440722000 | 0.056863000  | -0.004022000 |
| 8                      | -1.776701000 | 1.944063000  | -0.011566000 | 1                      | -0.632955000 | 2.742978000  | -0.211477000 |
| 1                      | 3.244774000  | 0.787433000  | -0.307170000 | 1                      | -2.861477000 | 2.075163000  | -0.108568000 |
| 1                      | 1.377325000  | 2.404904000  | 0.019956000  | 8                      | -1.688766000 | -2.122057000 | 0.035626000  |
| <b>r<sub>e3</sub></b>  |              |              |              | <b>r<sub>e4</sub></b>  |              |              |              |
| 6                      | 1.213663000  | 0.897133000  | 0.000392000  | 7                      | -0.357677000 | -1.804555000 | 0.000018000  |
| 6                      | -0.203503000 | 0.573900000  | 0.000134000  | 6                      | 0.626597000  | -0.841490000 | 0.000135000  |
| 7                      | 2.085404000  | -0.230927000 | 0.000087000  | 6                      | -1.658002000 | -1.381423000 | 0.000039000  |
| 6                      | -0.612394000 | -0.747476000 | -0.000188000 | 1                      | -2.387649000 | -2.190993000 | -0.000254000 |
| 6                      | 1.619859000  | -1.425077000 | -0.000211000 | 6                      | 0.228666000  | 0.485739000  | 0.000106000  |
| 7                      | 0.286669000  | -1.778802000 | -0.000313000 | 7                      | -2.071925000 | -0.158925000 | -0.000128000 |
| 6                      | -1.390179000 | 1.362884000  | 0.000033000  | 6                      | -1.158095000 | 0.912661000  | 0.000072000  |
| 7                      | -1.968928000 | -0.801867000 | -0.000176000 | 1                      | -0.139196000 | -2.789017000 | 0.000324000  |
| 6                      | -2.452257000 | 0.505026000  | -0.000084000 | 6                      | 2.031356000  | -0.826347000 | -0.000075000 |
| 1                      | -2.539091000 | -1.631214000 | -0.000289000 | 7                      | 1.379027000  | 1.201591000  | 0.000043000  |
| 1                      | -1.433870000 | 2.440511000  | 0.000143000  | 7                      | 2.474819000  | 0.431871000  | -0.000076000 |
| 8                      | 1.663537000  | 2.027337000  | 0.000447000  | 8                      | -1.508459000 | 2.079127000  | -0.000055000 |
| 1                      | 0.009841000  | -2.748415000 | -0.000605000 | 1                      | 1.465614000  | 2.206698000  | 0.000176000  |
| 1                      | 2.297139000  | -2.279488000 | -0.000352000 | 1                      | 2.736070000  | -1.644427000 | -0.000463000 |
| 1                      | -3.515464000 | 0.682741000  | -0.000115000 | <b>r<sub>e5</sub></b>  |              |              |              |
| <b>r<sub>e5</sub></b>  |              |              |              | <b>r<sub>e6</sub></b>  |              |              |              |
| 6                      | -1.064273346 | -1.171435443 | 0.000000000  | 7                      | -1.332748000 | 0.621852000  | -0.117815000 |
| 7                      | -1.134793093 | 0.175106868  | 0.000000000  | 7                      | -0.029986000 | 1.073859000  | 0.124130000  |
| 6                      | 0.160951906  | -1.767202240 | 0.000000000  | 6                      | 0.814368000  | -0.070916000 | 0.029671000  |
| 1                      | -2.029918106 | 0.646677882  | 0.000000000  | 7                      | -0.023846000 | -1.204183000 | 0.019808000  |
| 1                      | 0.270192082  | -2.842047489 | 0.000000000  | 6                      | -1.227025000 | -0.742400000 | -0.022021000 |
| 6                      | 0.000000000  | 1.040196839  | 0.000000000  | 1                      | -2.054034000 | 1.091727000  | 0.420467000  |
| 6                      | 1.278385869  | -0.894591602 | 0.000000000  | 1                      | 0.242206000  | 1.875034000  | -0.432825000 |
| 8                      | -0.179351928 | 2.237120104  | 0.000000000  | 8                      | 2.015285000  | -0.022817000 | -0.026214000 |
| 1                      | 2.279696118  | -1.330768596 | 0.000000000  | 1                      | -2.128448000 | -1.345027000 | -0.006695000 |
| 7                      | 1.230332871  | 0.410783894  | 0.000000000  | <b>r<sub>e6</sub></b>  |              |              |              |
| 1                      | -2.004322332 | -1.713862232 | 0.000000000  | <b>r<sub>e6</sub></b>  |              |              |              |

|                            |              |              |              |                            |              |              |              |
|----------------------------|--------------|--------------|--------------|----------------------------|--------------|--------------|--------------|
| <b><math>r_{e7}</math></b> |              |              |              | <b><math>r_{e8}</math></b> |              |              |              |
| 7                          | -0.229795000 | -1.764066000 | -0.078879000 | 6                          | -0.698979000 | -0.794688000 | 0.019617000  |
| 7                          | 0.667148000  | -0.724750000 | 0.001492000  | 7                          | 0.515417000  | -1.478120000 | -0.071659000 |
| 6                          | -1.557064000 | -1.433263000 | 0.019905000  | 6                          | -0.673640000 | 0.739373000  | 0.000553000  |
| 6                          | 0.224199000  | 0.590608000  | 0.004422000  | 8                          | -1.645754000 | 1.444954000  | -0.100593000 |
| 7                          | -2.066211000 | -0.257098000 | 0.016719000  | 6                          | 1.614019000  | -0.803969000 | -0.049986000 |
| 6                          | -1.207341000 | 0.872146000  | -0.002712000 | 7                          | 0.593662000  | 1.303310000  | 0.139867000  |
| 6                          | 2.024369000  | -0.722175000 | -0.010245000 | 1                          | 2.574358000  | -1.320261000 | -0.066093000 |
| 6                          | 1.391050000  | 1.327569000  | 0.014275000  | 1                          | 0.679184000  | 2.271068000  | -0.151727000 |
| 7                          | 2.480699000  | 0.516752000  | 0.011481000  | 7                          | 1.743882000  | 0.543069000  | -0.044196000 |
| 8                          | -1.651419000 | 1.998893000  | -0.015501000 | 1                          | 2.581250000  | 0.948465000  | 0.357864000  |
| 1                          | 1.474812000  | 2.403570000  | 0.023662000  | 8                          | -1.760986000 | -1.360125000 | 0.084439000  |
| 1                          | 2.611103000  | -1.628984000 | -0.022905000 |                            |              |              |              |
| 1                          | 0.109552000  | -2.656583000 | 0.253050000  |                            |              |              |              |
| 1                          | -2.198279000 | -2.314325000 | 0.060653000  |                            |              |              |              |
| <b><math>r_{e9}</math></b> |              |              |              |                            |              |              |              |
| 6                          | 0.992772000  | 1.186454000  | 0.000000000  |                            |              |              |              |
| 7                          | -0.161481000 | 1.786277000  | 0.000000000  |                            |              |              |              |
| 7                          | 1.125749000  | -0.150629000 | 0.000000000  |                            |              |              |              |
| 1                          | 2.039733000  | -0.587814000 | 0.000000000  |                            |              |              |              |
| 6                          | -1.223187000 | 0.918221000  | 0.000000000  |                            |              |              |              |
| 6                          | 0.000000000  | -1.032227000 | 0.000000000  |                            |              |              |              |
| 1                          | -2.199543000 | 1.403239000  | 0.000000000  |                            |              |              |              |
| 8                          | 0.177439000  | -2.224366000 | 0.000000000  |                            |              |              |              |
| 7                          | -1.219671000 | -0.382538000 | 0.000000000  |                            |              |              |              |
| 1                          | 1.910603000  | 1.773033000  | 0.000000000  |                            |              |              |              |
